# Supplementary material
Source: MDPI journal article supplement (https://www.mdpi.com/2304-6740/10/8/107)
Supplement: s1 [file s1]

Supporting Information for

**Fluoro-germanium(IV) cations with neutral co-ligands – synthesis, properties and comparison with neutral GeF<sub>4</sub> adducts**

Madeleine S. Woodward<sup>a</sup>, Rhys P. King<sup>a</sup>, Robert D. Bannister<sup>a</sup>, Julian Grigg<sup>b</sup>, Graeme McRobbie<sup>b</sup>,  
William Levason<sup>a</sup> and Gillian Reid<sup>a\*</sup>

<sup>a</sup> School of Chemistry, University of Southampton, Southampton SO17 1BJ, UK; G.Reid@soton.ac.uk

<sup>b</sup> GE Healthcare, Pollards Wood, Nightingales Lane, Chalfont St Giles, Bucks, HP8 4SP, UK.

Containing spectra for the complexes as follows:

Figure S1 [GeF<sub>4</sub>(dmsO)<sub>2</sub>]  
Figure S2. [GeF<sub>4</sub>(dmf)<sub>2</sub>]  
Figure S3. [GeF<sub>4</sub>(pyNO)<sub>2</sub>]  
Figure S4. [GeF<sub>3</sub>(dmsO)<sub>3</sub>][OTf]  
Figure S5. [GeF<sub>3</sub>(dmf)<sub>3</sub>][OTf]  
Figure S6. [GeF<sub>3</sub>(py)<sub>3</sub>][OTf]  
Figure S7. [GeF<sub>3</sub>(pyNO)<sub>3</sub>][OTf]  
Figure S8. [GeF<sub>3</sub>(OPPh<sub>3</sub>)<sub>3</sub>][OTf]  
Figure S9. [GeF<sub>3</sub>(OPMe<sub>3</sub>)<sub>3</sub>][OTf]  
Figure S10. [GeF<sub>3</sub>(OAsPh<sub>3</sub>)<sub>3</sub>][OTf] and [GeF<sub>2</sub>(OAsPh<sub>3</sub>)<sub>4</sub>][OTf]<sub>2</sub>  
Figure S11. [GeF<sub>3</sub>(terpy)][OTf]  
Figure S12. [GeF<sub>3</sub>(Me<sub>3</sub>tacn)][OTf]  
Figure S13. [GeF<sub>2</sub>(Me<sub>4</sub>-cyclen)][OTf]<sub>2</sub>  
Figure S14. [GeF<sub>2</sub>(Me<sub>4</sub>-cyclam)][OTf]<sub>2</sub>  
Table S1 X-ray crystallographic data  
Figure S15. Frontier orbitals of *cis/trans*-[GeF<sub>4</sub>(OPMe<sub>3</sub>)<sub>2</sub>]  
Figure S16. Frontier orbitals of *fac/mer*-[GeF<sub>3</sub>(OPMe<sub>3</sub>)<sub>3</sub>]<sup>+</sup>  
Figure S17. Frontier orbitals of *cis/trans*-[GeF<sub>2</sub>(OPMe<sub>3</sub>)<sub>4</sub>]<sup>2+</sup>  
Table S2. xyz coordinates from DFT calculations

Figure S1 [GeF<sub>4</sub>(dmsO)<sub>2</sub>]

S1.1 <sup>1</sup>H NMR spectrum (CD<sub>3</sub>NO<sub>2</sub><sup>\*</sup>, 298 K) (CH<sub>2</sub>Cl<sub>2</sub><sup>%</sup>):

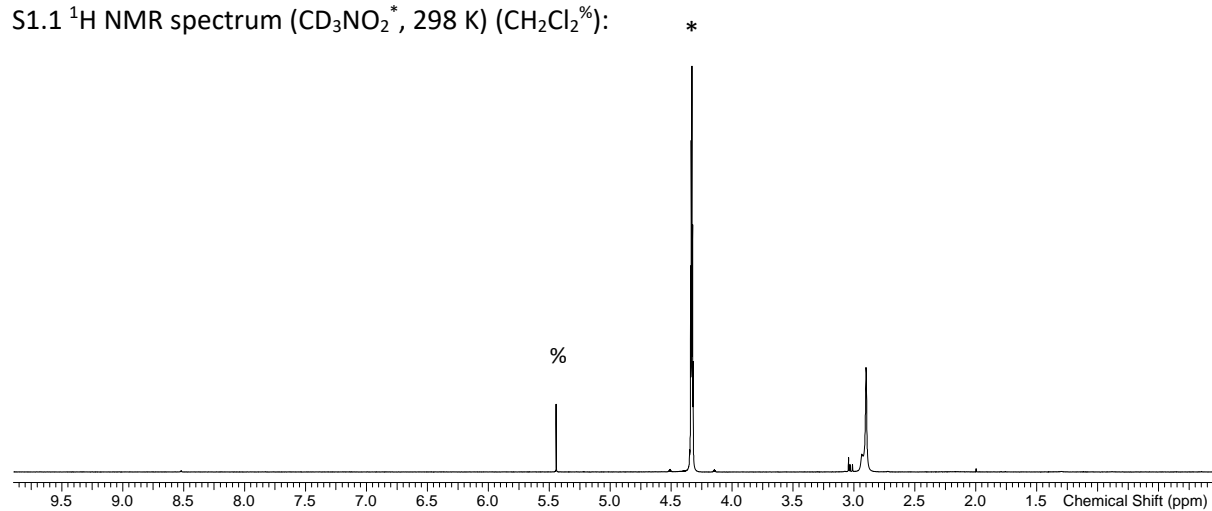

S1.2 <sup>1</sup>H NMR spectrum (CD<sub>3</sub>NO<sub>2</sub><sup>\*</sup>, 253 K):

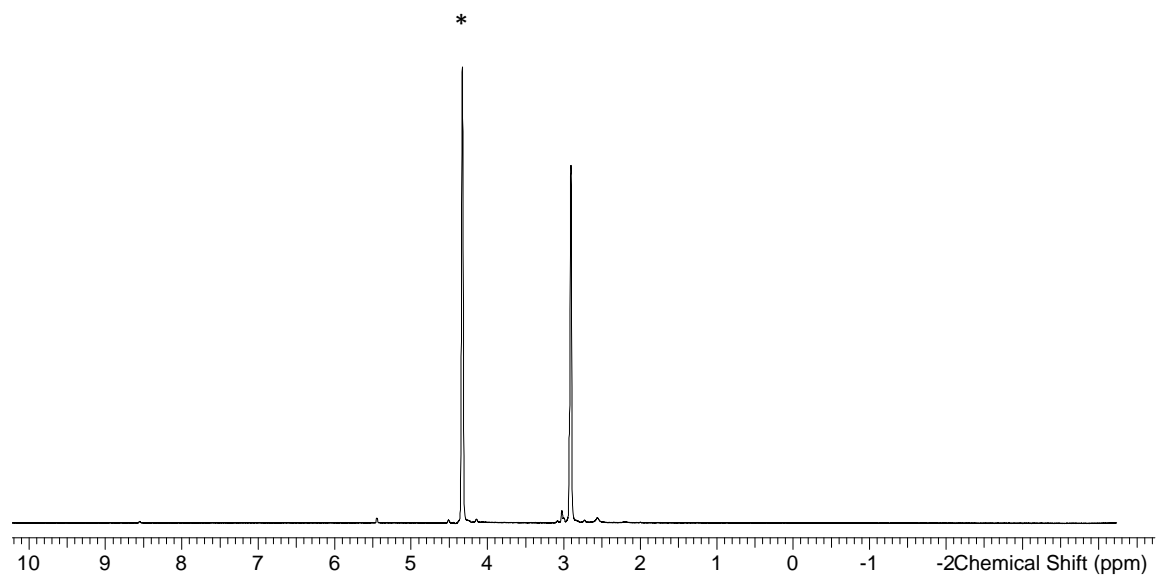

S1.3  $^{19}\text{F}\{^1\text{H}\}$  NMR spectrum ( $\text{CD}_3\text{NO}_2$ , 298 K):

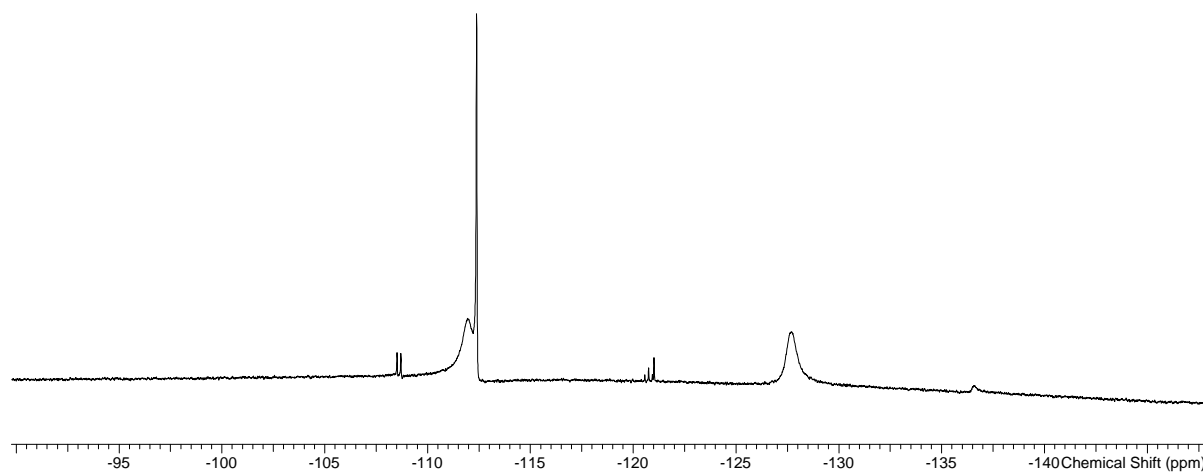

S1.4  $^{19}\text{F}\{^1\text{H}\}$  NMR spectrum ( $\text{CD}_3\text{NO}_2$ , 253 K):

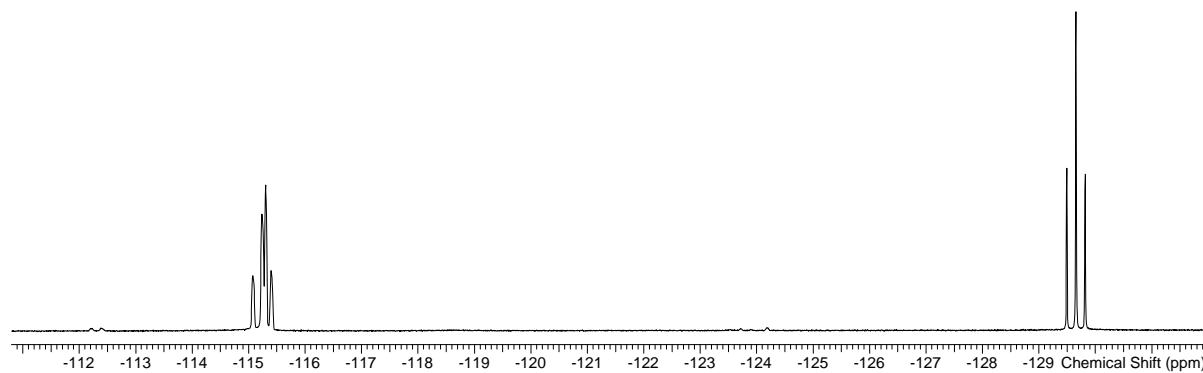

S1.5 IR spectrum (Nujol/ $\text{cm}^{-1}$ ):

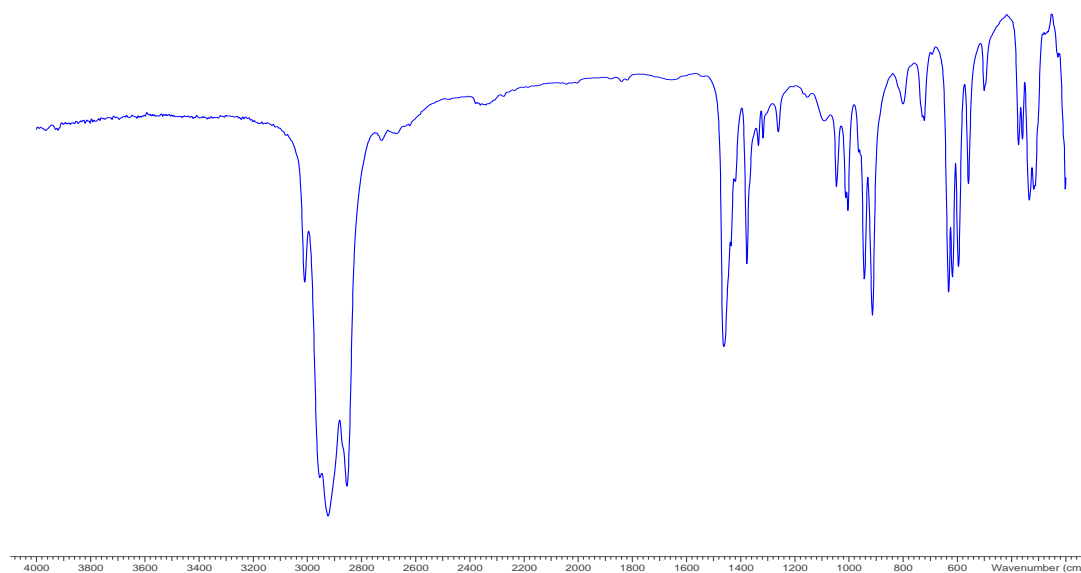

Figure S2.  $[\text{GeF}_4(\text{dmf})_2]$

S2.1  $^1\text{H}$  NMR spectrum ( $\text{CD}_3\text{NO}_2^*$ , 298 K) ( $\text{CH}_2\text{Cl}_2^\%$ ,  $\text{H}_2\text{O}^\&$ ):

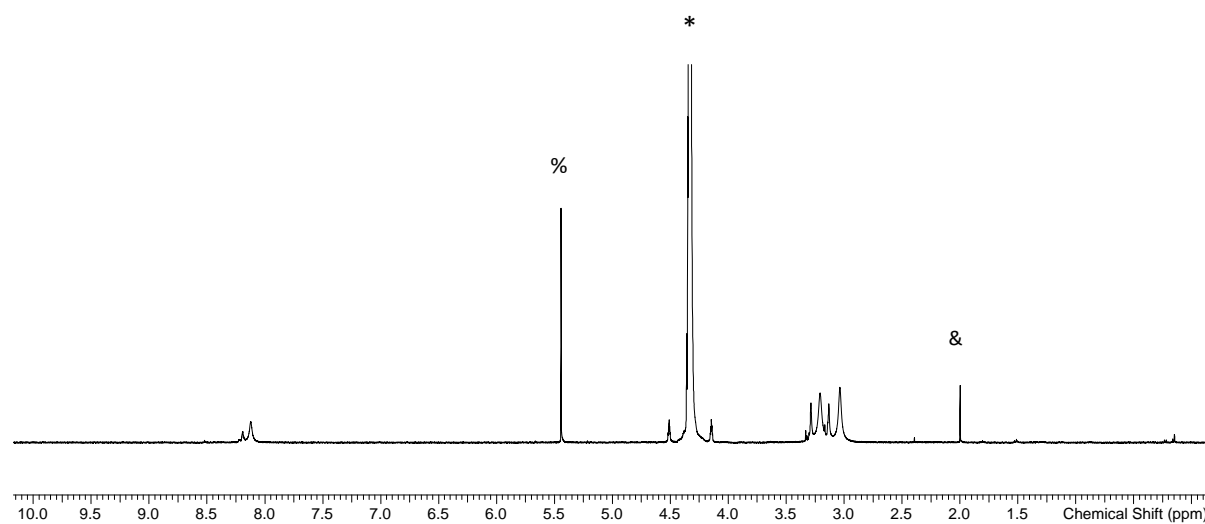

S2.2  $^1\text{H}$  NMR spectrum ( $\text{CD}_3\text{NO}_2^*$ , 253 K) ( $\text{CH}_2\text{Cl}_2^\%$ ,  $\text{H}_2\text{O}^\&$ , uncoordinated  $\text{DMF}^\$$ ):

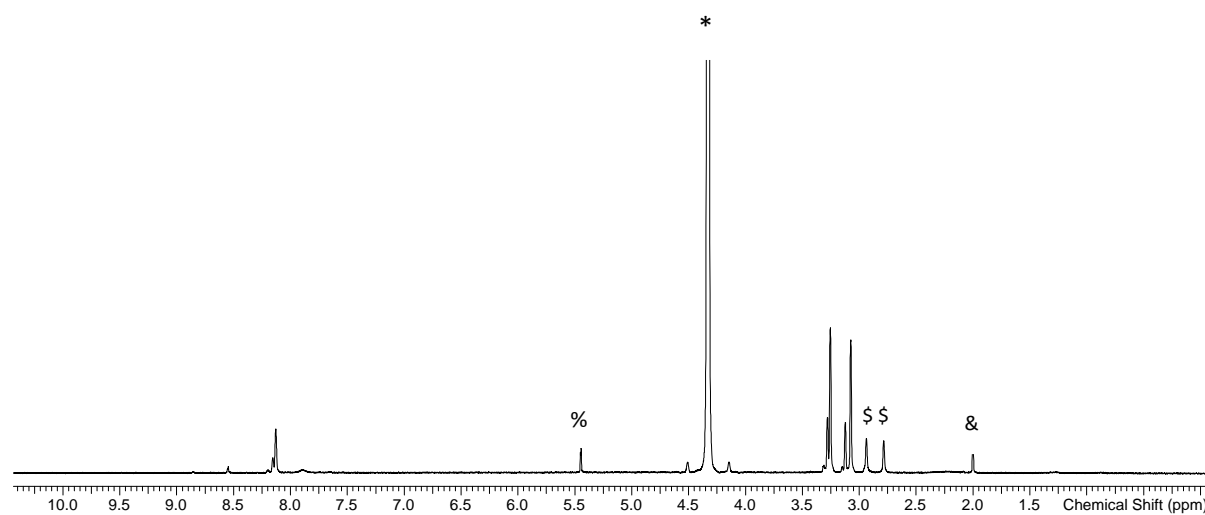

S2.3  $^{19}\text{F}\{^1\text{H}\}$  NMR spectrum ( $\text{CD}_3\text{NO}_2$ , 298 K):

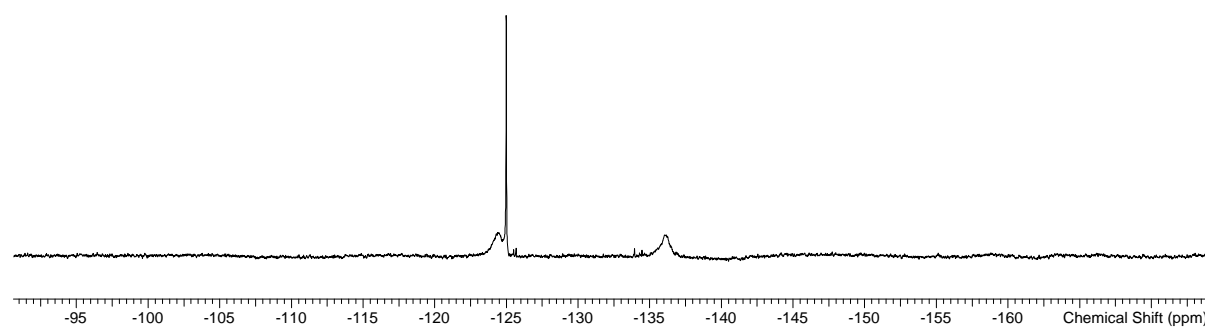

S2.4  $^{19}\text{F}\{^1\text{H}\}$  NMR spectrum ( $\text{CD}_3\text{NO}_2$ , 253 K):

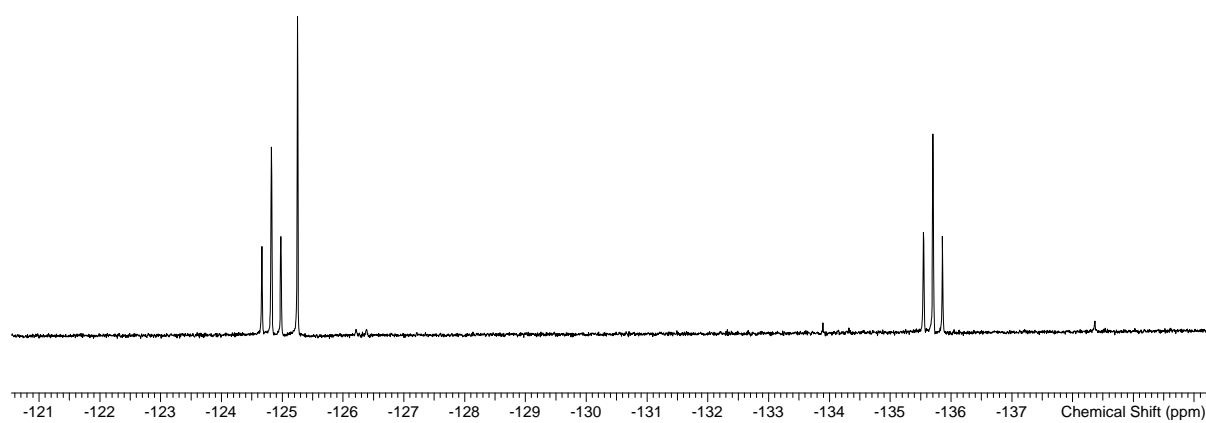

S2.5 IR spectrum (Nujol/ $\text{cm}^{-1}$ ):

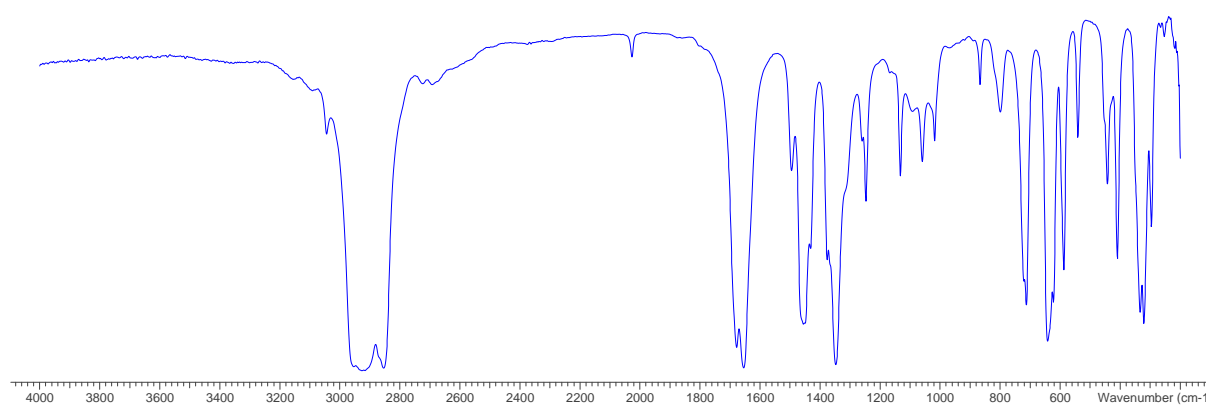

Figure S3.  $[\text{GeF}_4(\text{pyNO})_2]$

S3.1  $^1\text{H}$  NMR spectrum ( $\text{CD}_3\text{NO}_2^*$ , 298 K) ( $\text{CH}_2\text{Cl}_2^{\%}$ ):

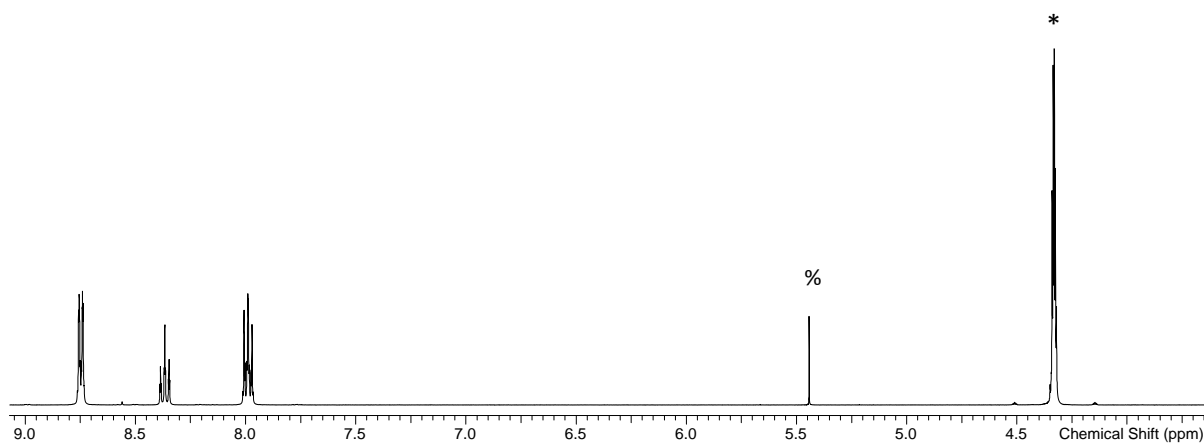

S3.2  $^1\text{H}$  NMR spectrum ( $\text{CD}_3\text{NO}_2^*$ , 253 K):

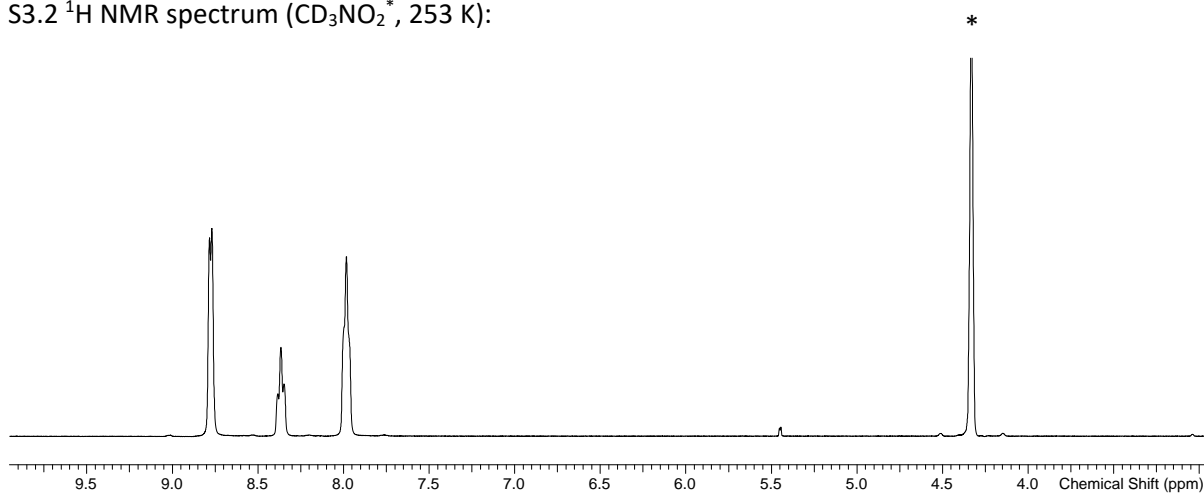

S3.3  $^{19}\text{F}\{^1\text{H}\}$  NMR spectrum ( $\text{CD}_3\text{NO}_2$ , 298 K):

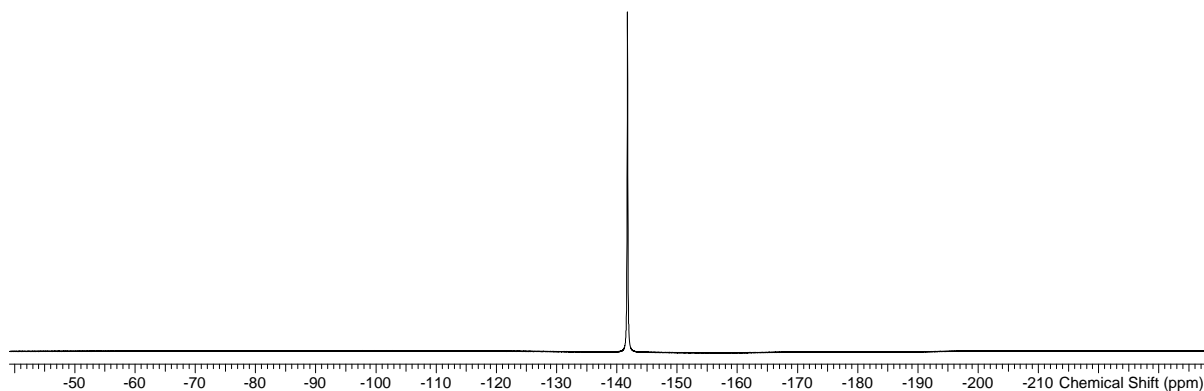

S3.5 IR spectrum (Nujol/cm<sup>-1</sup>):

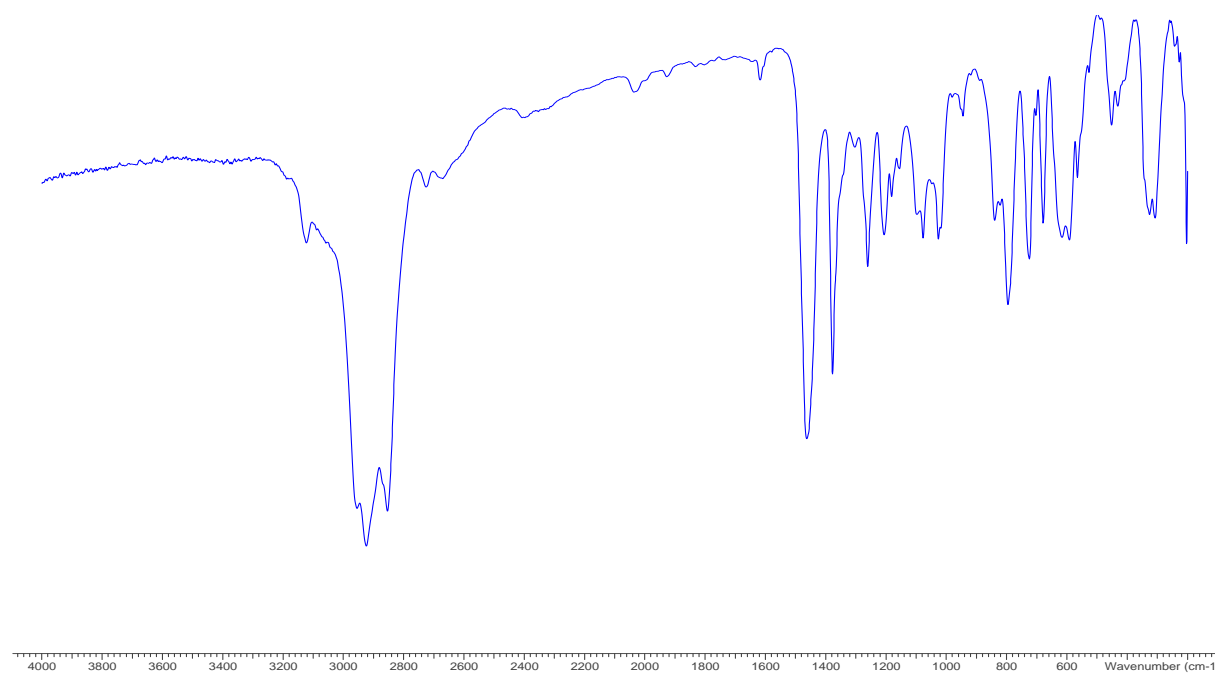

Figure S4.  $[\text{GeF}_3(\text{dmsO})_3][\text{OTf}]$   
S4.1  $^1\text{H}$  NMR spectrum ( $\text{CD}_2\text{Cl}_2^*$ , 298 K):

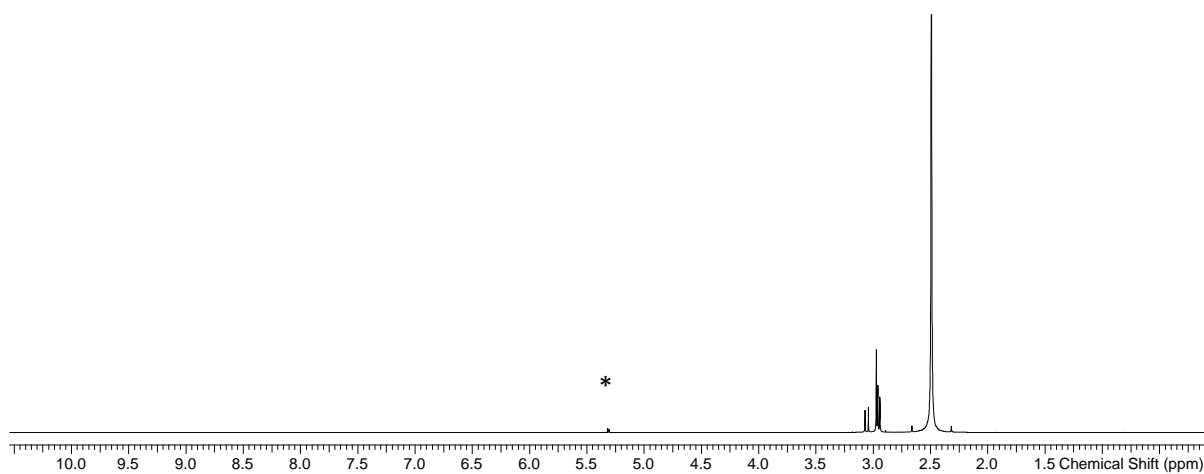

S4.2  $^{19}\text{F}\{^1\text{H}\}$  NMR spectrum ( $\text{CD}_2\text{Cl}_2$ , 298 K) (unidentified impurity<sup>f</sup>). OTf resonance omitted for clarity:

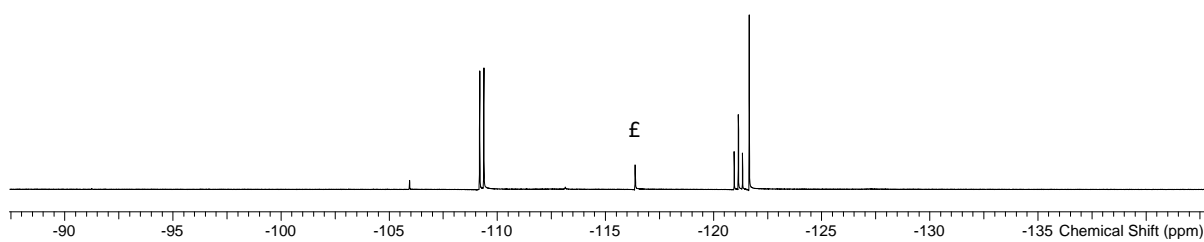

S4.3 IR spectrum (Nujol/ $\text{cm}^{-1}$ ):

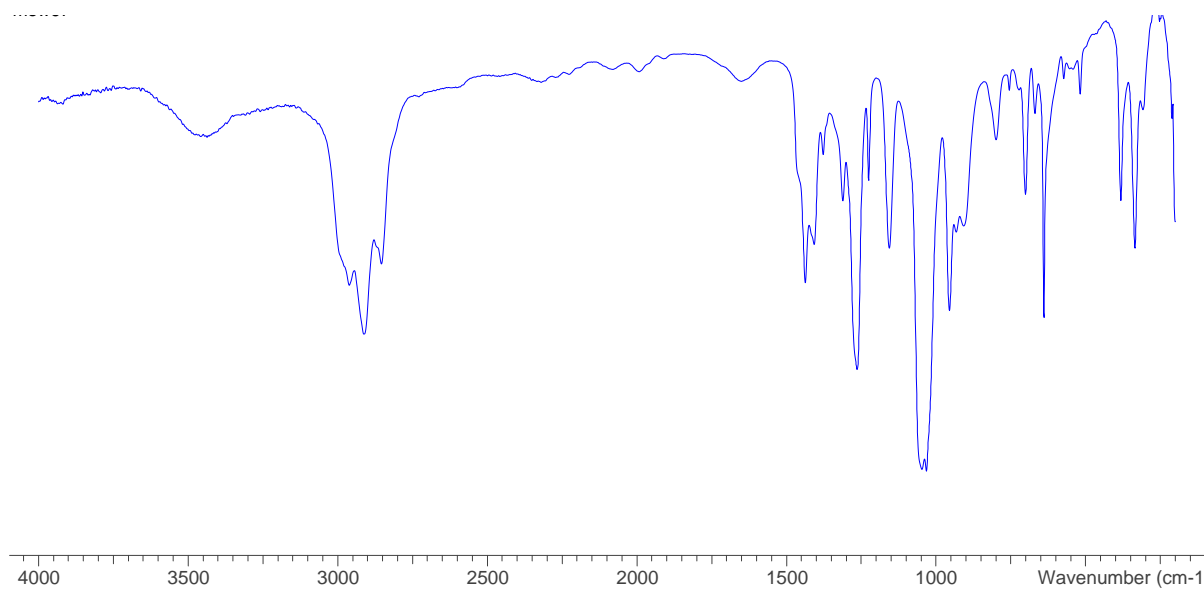



Figure S5.  $[\text{GeF}_3(\text{dmf})_3][\text{OTf}]$

S5.1  $^1\text{H}$  NMR spectrum ( $\text{CD}_3\text{NO}_2^*$ , 298 K):

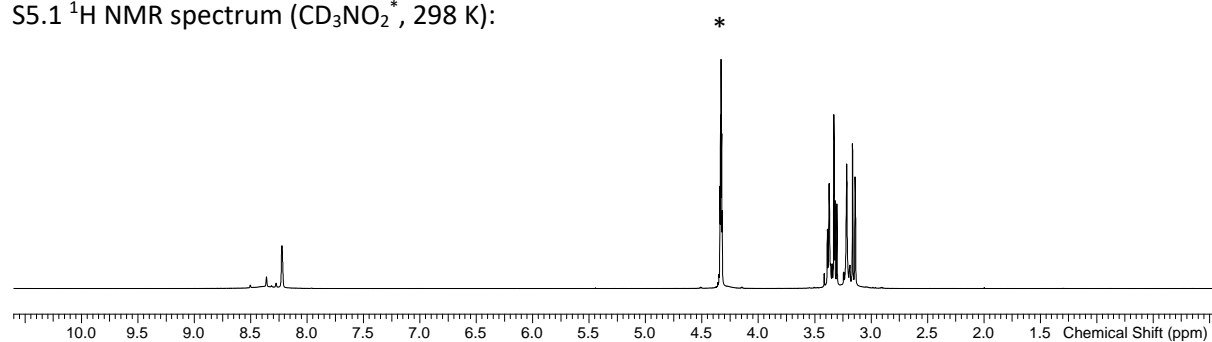

S5.2  $^{19}\text{F}\{^1\text{H}\}$  NMR spectrum ( $\text{CD}_3\text{NO}_2$ , 298 K). OTf resonance omitted for clarity:

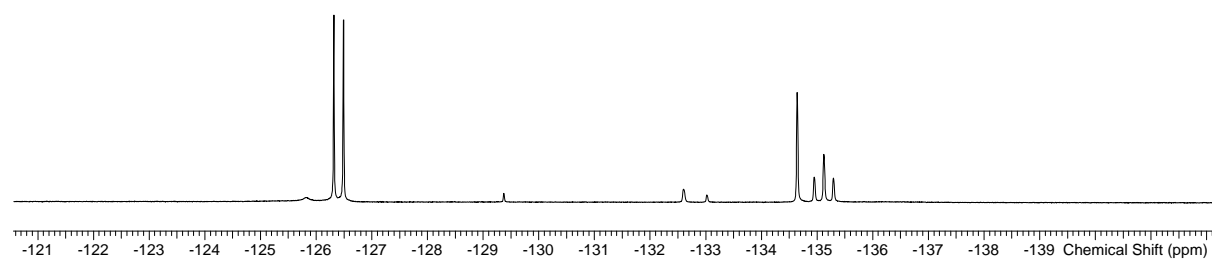

S5.3 IR spectrum (Nujol/ $\text{cm}^{-1}$ ):

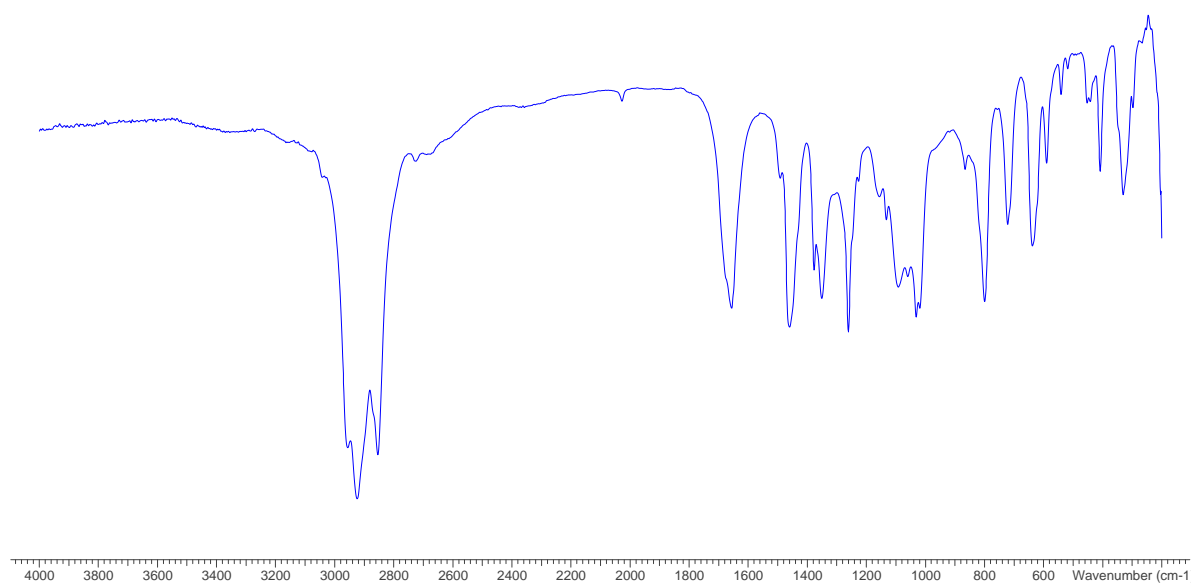

Figure S6.  $[\text{GeF}_3(\text{py})_3][\text{OTf}]$   
S6.1  $^1\text{H}$  NMR spectrum ( $\text{CD}_2\text{Cl}_2^*$ , 298 K):

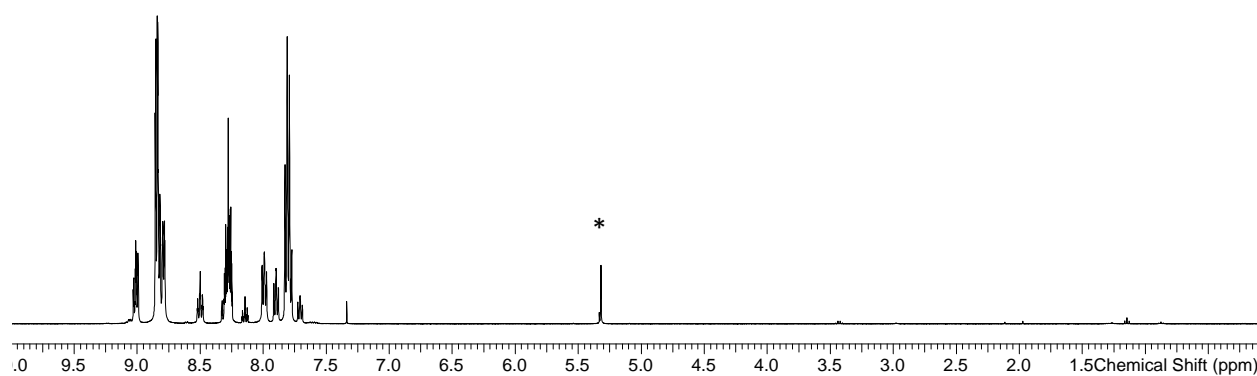

S6.2  $^{19}\text{F}\{^1\text{H}\}$  NMR spectrum ( $\text{CD}_2\text{Cl}_2$ , 298 K) ( $\text{F}^-$  degradation product<sup>#</sup>). OTf resonance omitted for clarity:

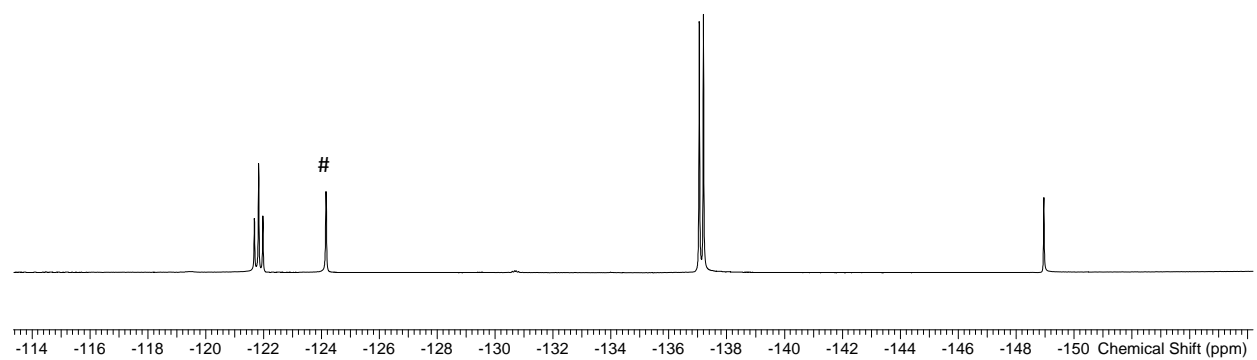

S6.3 IR spectrum (Nujol/ $\text{cm}^{-1}$ ):

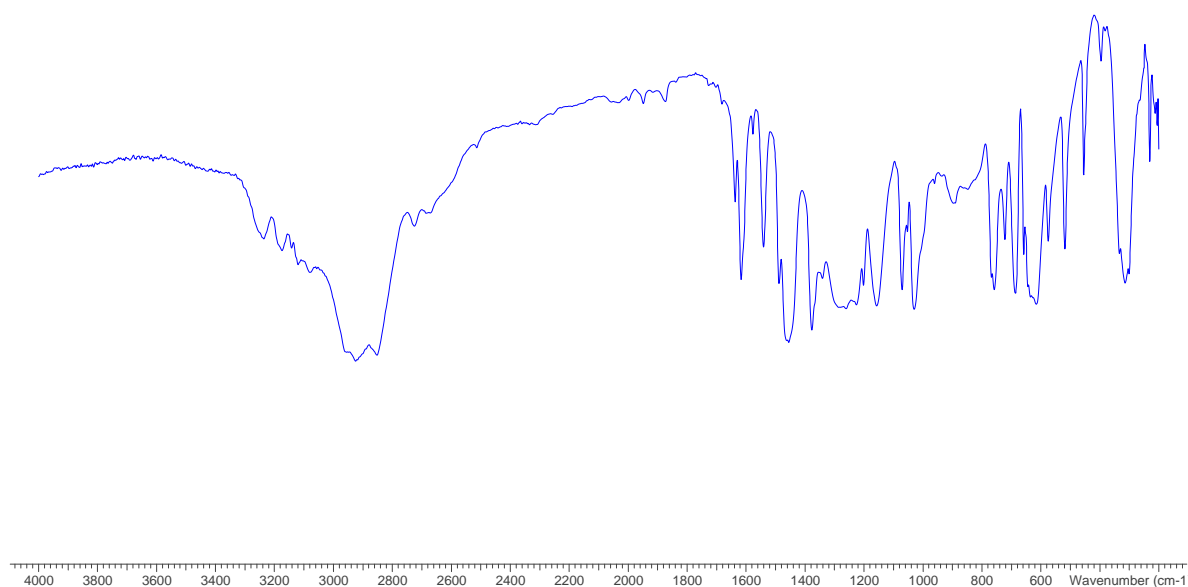

Figure S7.  $[\text{GeF}_3(\text{pyNO})_3][\text{OTf}]$

S7.1:  $^1\text{H}$  NMR spectrum ( $\text{CD}_3\text{NO}_2^*$ , 298 K) ( $\text{CH}_2\text{Cl}_2^\%$ ): \*

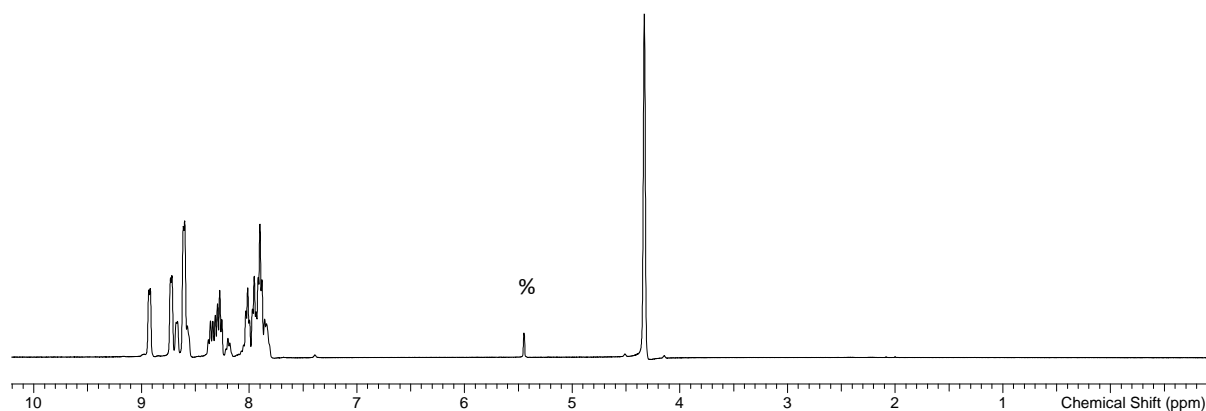

S7.2:  $^{19}\text{F}\{^1\text{H}\}$  NMR spectrum ( $\text{CD}_3\text{NO}_2$ , 298 K) ( $[\text{GeF}_4(\text{pyNO})_2]^\&$  impurity). OTf resonance omitted for clarity:

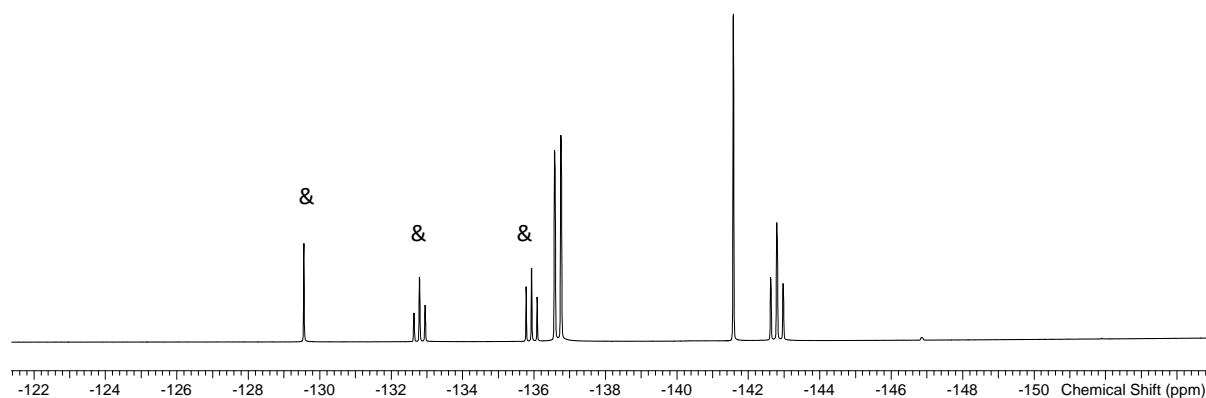

S7.3 IR spectrum (Nujol/cm<sup>-1</sup>):

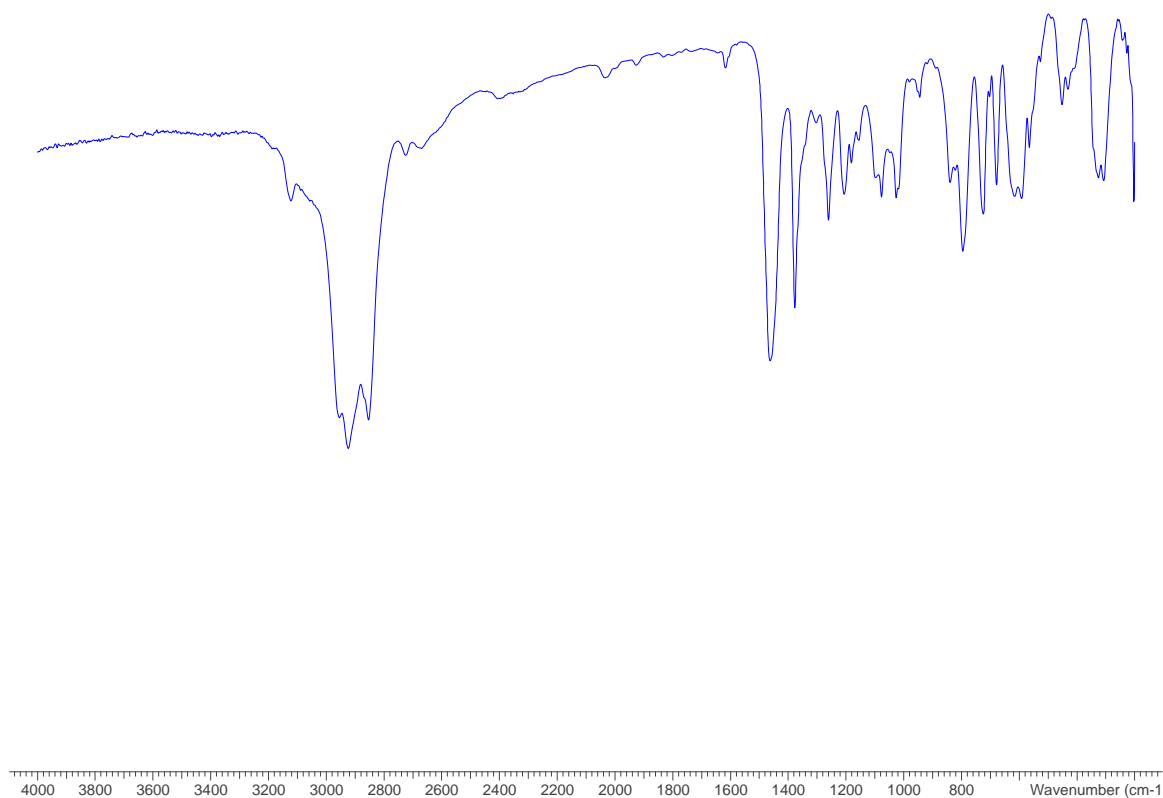

Figure S8.  $[\text{GeF}_3(\text{OPPh}_3)_3][\text{OTf}]$

S8.1  $^1\text{H}$  NMR spectrum ( $\text{CD}_2\text{Cl}_2^*$ , 298 K):

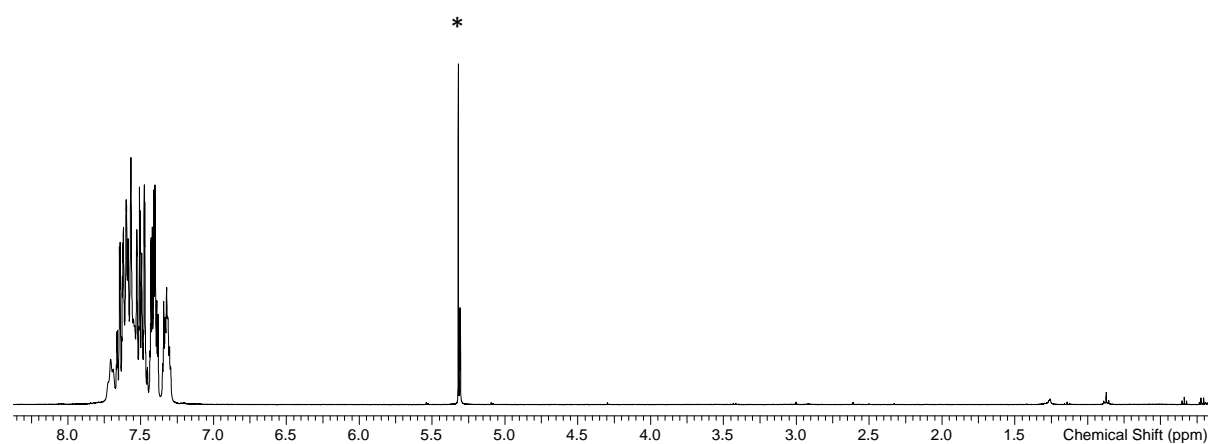

S8.2  $^{19}\text{F}\{^1\text{H}\}$  NMR spectrum ( $\text{CD}_2\text{Cl}_2$ , 298 K). OTf resonance omitted for clarity:

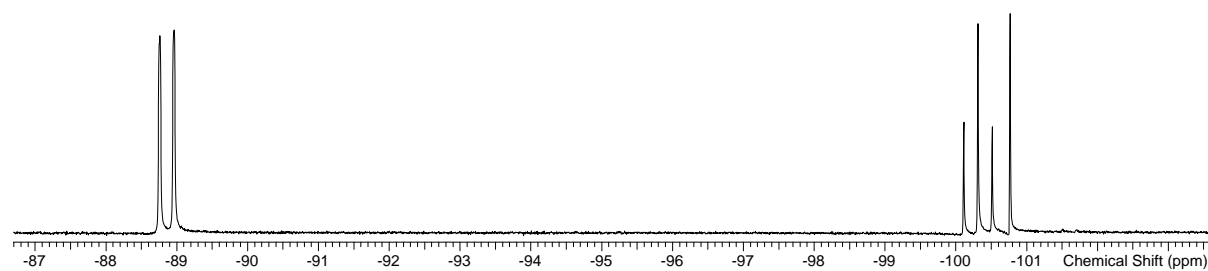

S8.3  $^{31}\text{P}\{^1\text{H}\}$  NMR spectrum ( $\text{CD}_2\text{Cl}_2$ , 298 K):

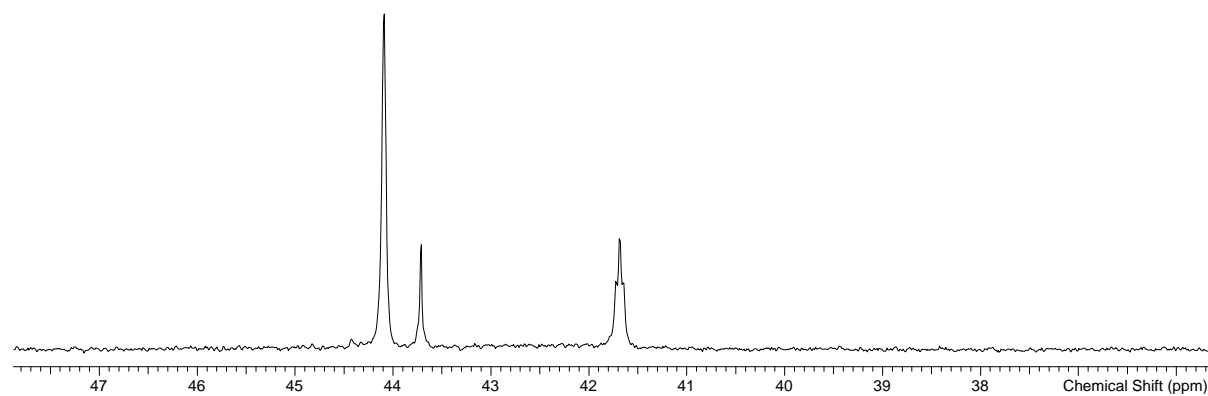

S8.4 IR spectrum (Nujol/cm<sup>-1</sup>):

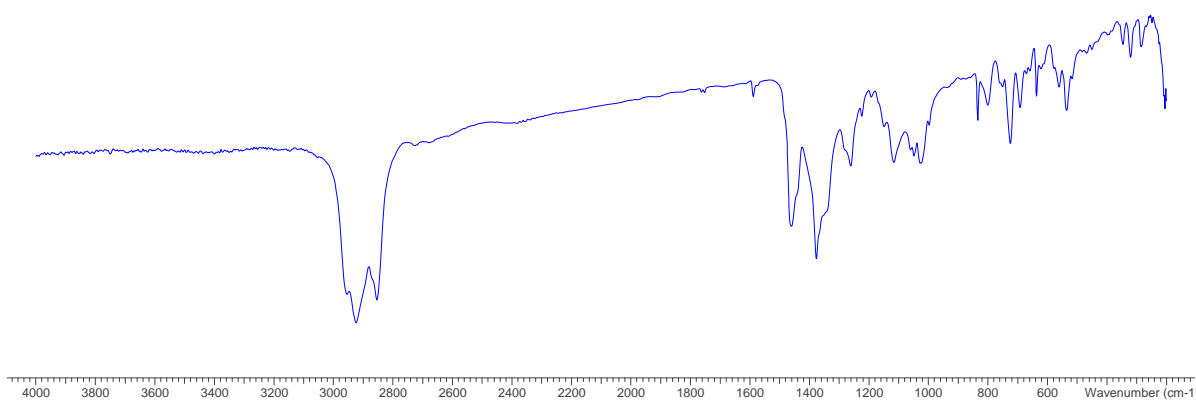

Figure S9.  $[\text{GeF}_3(\text{OPMe}_3)_3][\text{OTf}]$

S9.1  $^1\text{H}$  NMR spectrum ( $\text{CD}_3\text{NO}_2$ , 298 K) (unidentified species%):

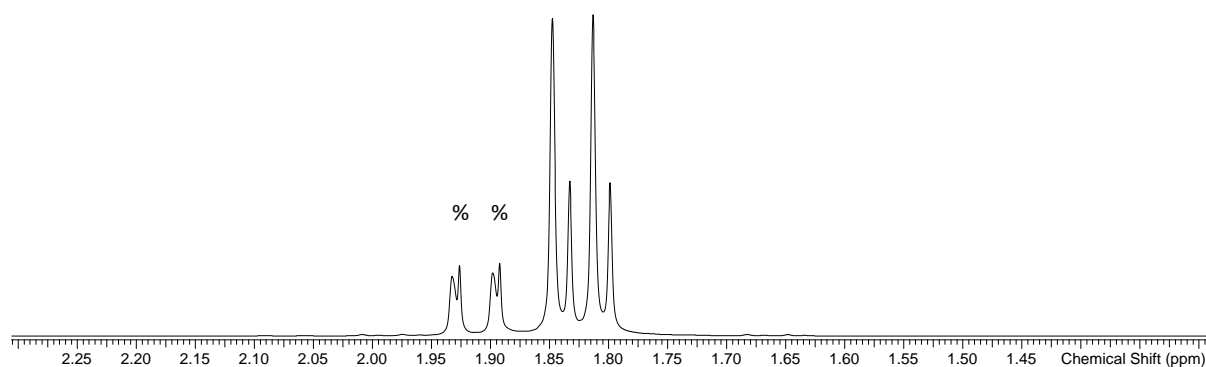

S9.2  $^{19}\text{F}\{^1\text{H}\}$  NMR spectrum ( $\text{CD}_3\text{NO}_2$ , 298 K). OTf resonance omitted for clarity:

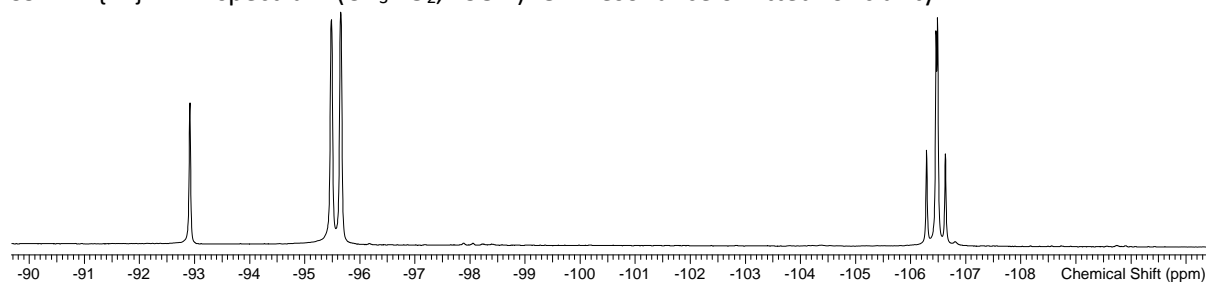

S9.3  $^{31}\text{P}\{^1\text{H}\}$  NMR spectrum ( $\text{CD}_3\text{NO}_2$ , 298 K) (unidentified species%,  $[\text{Me}_3\text{POH}]^+$  impurity%):

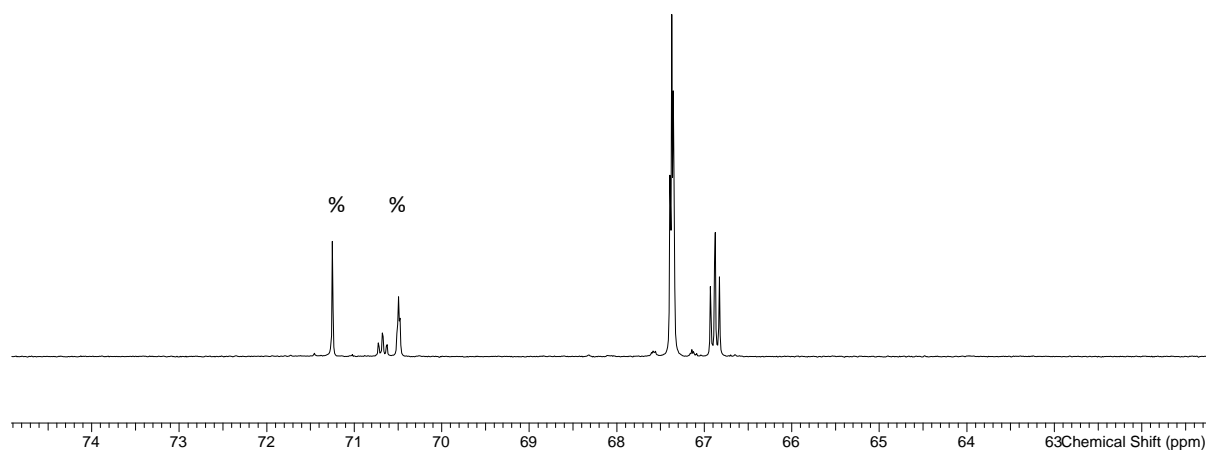

S9.4 IR spectrum (Nujol/cm<sup>-1</sup>)

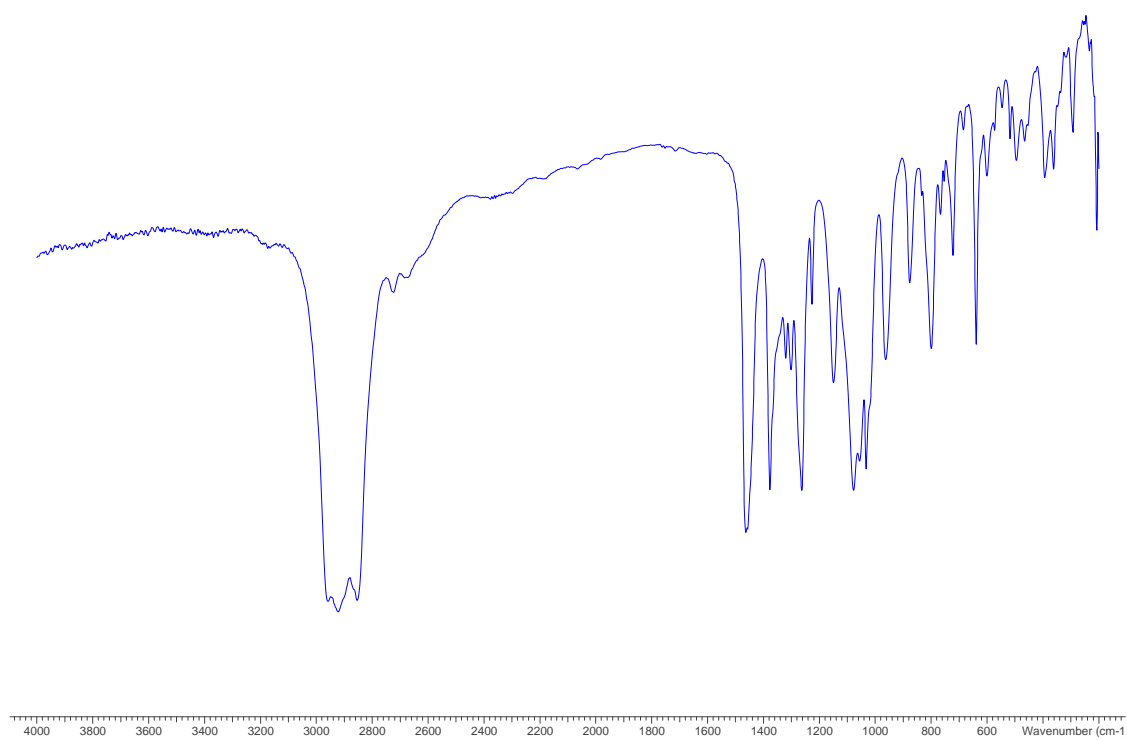



Figure S10.  $[\text{GeF}_3(\text{OAsPh}_3)_3][\text{OTf}]$  and  $[\text{GeF}_2(\text{OAsPh}_3)_4][\text{OTf}]_2$   
 S10.1  $^1\text{H}$  NMR spectrum ( $\text{CD}_3\text{NO}_2^*$ , 298 K) ( $\text{CH}_2\text{Cl}_2^\%$ ):

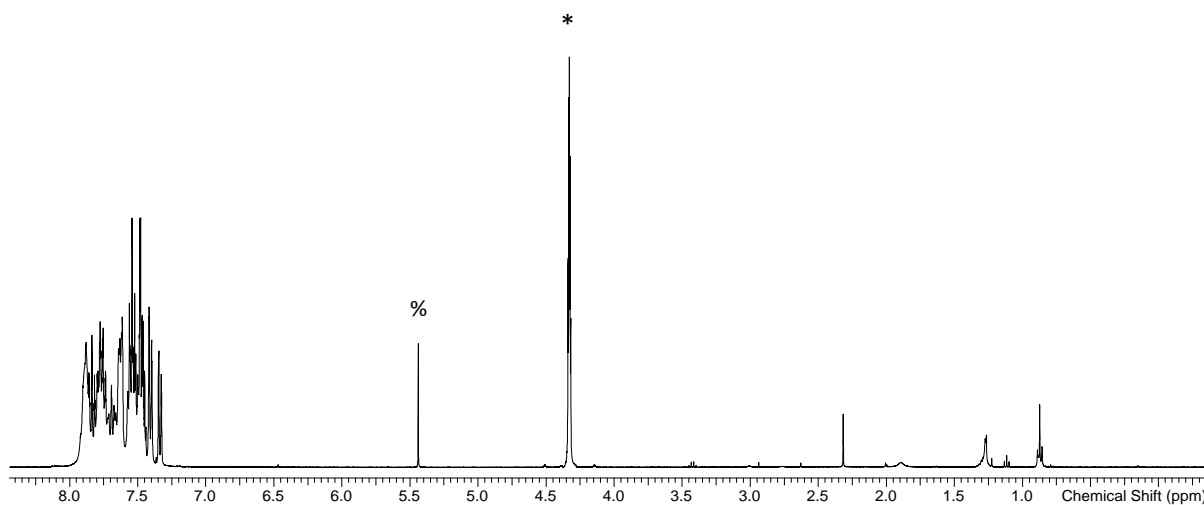

S10.2  $^9\text{F}\{^1\text{H}\}$  NMR spectrum ( $\text{CD}_3\text{NO}_2$ , 298 K) ( $[\text{GeF}_2(\text{OAsPh}_3)_4][\text{OTf}]_2^X$ ,  $[\text{GeF}_3(\text{OAsPh}_3)_3][\text{OTf}]^\%$ )

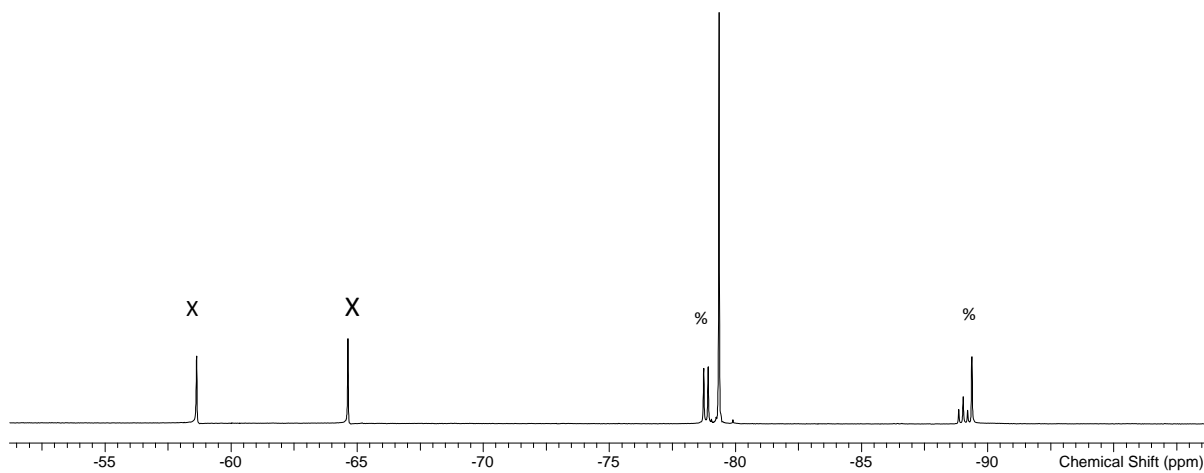

S10.3 IR spectrum ( $\text{Nujol}/\text{cm}^{-1}$ )

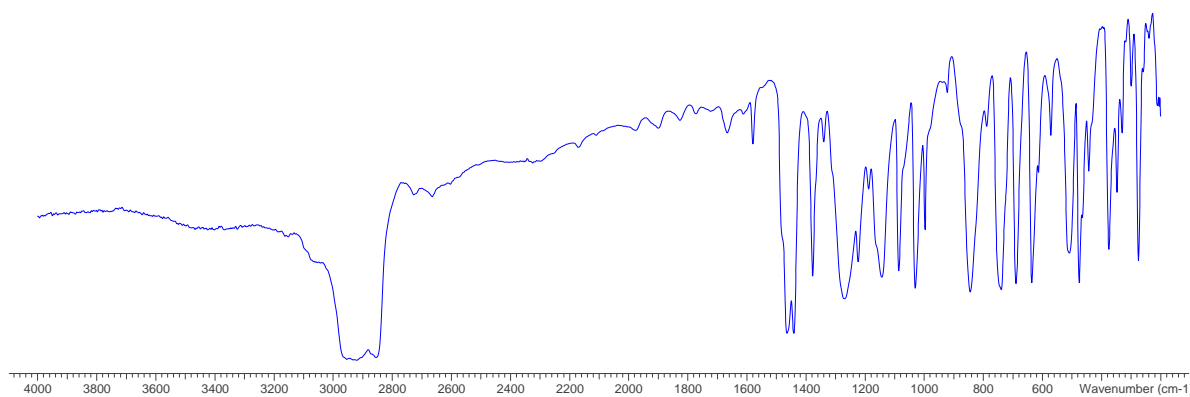

Figure S11.  $[\text{GeF}_3(\text{terpy})][\text{OTf}]$  (complex poorly soluble)  
S11.1  $^1\text{H}$  NMR spectrum ( $\text{CD}_2\text{Cl}_2^*$ , 298 K):

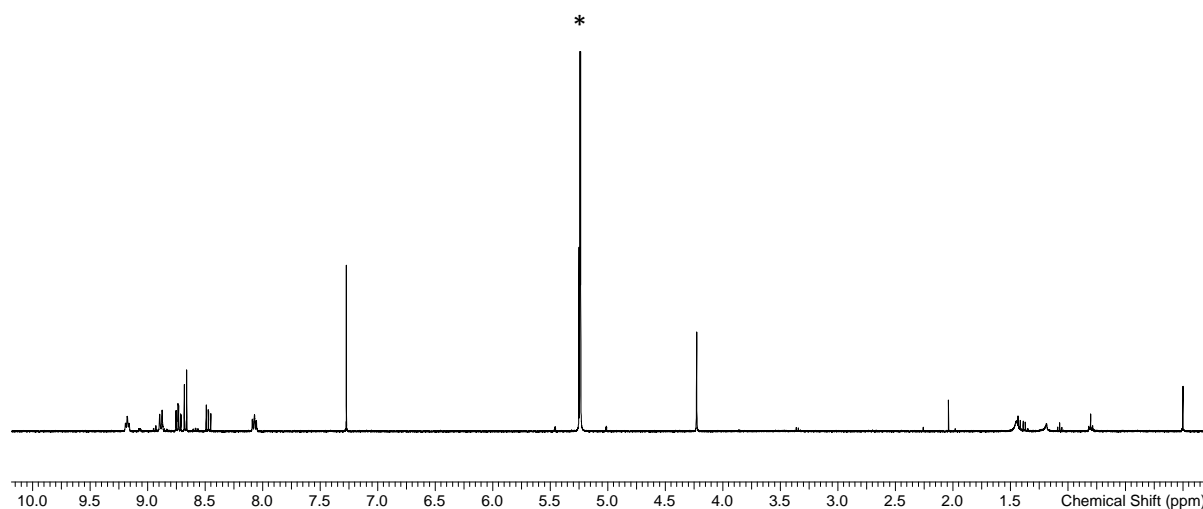

S11.2  $^{19}\text{F}\{^1\text{H}\}$  NMR spectrum ( $\text{CD}_2\text{Cl}_2$ , 298 K). OTf resonance omitted for clarity:

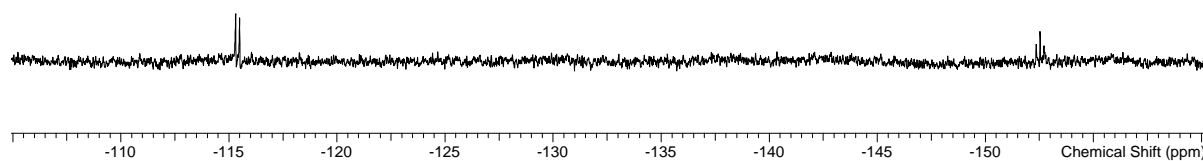

S11.3 IR spectrum (Nujol/ $\text{cm}^{-1}$ )

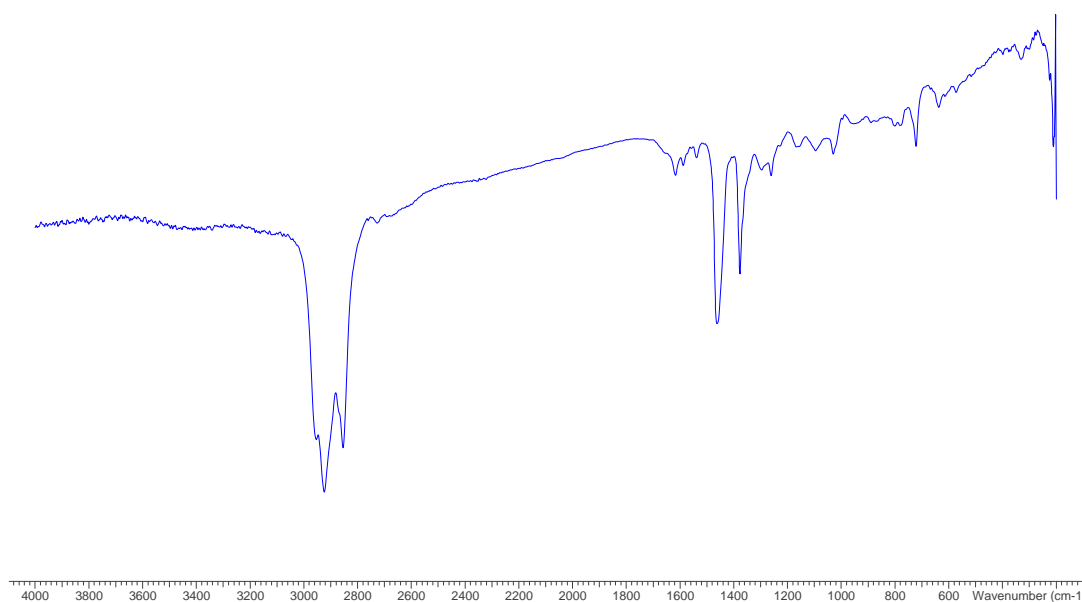

Figure S12.  $[\text{GeF}_3(\text{Me}_3\text{-tacn})][\text{OTf}]$   
S12.1  $^1\text{H}$  NMR spectrum ( $\text{CD}_3\text{NO}_2^*$ , 298 K):

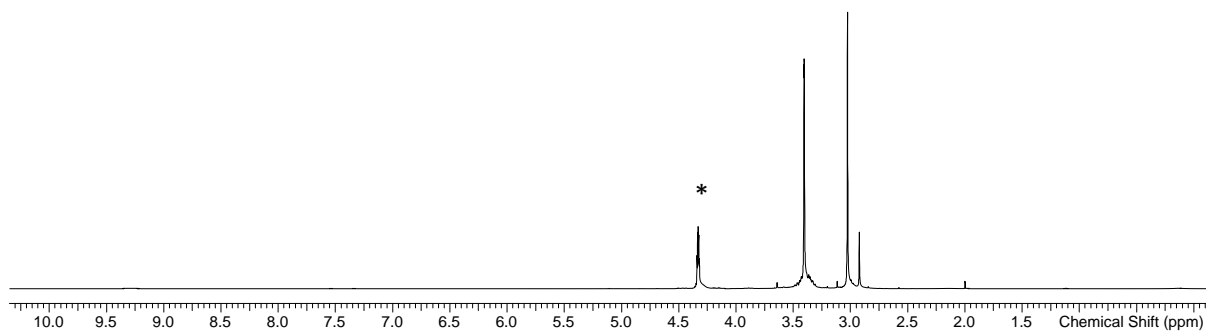

S12.2  $^{19}\text{F}\{^1\text{H}\}$  NMR spectrum ( $\text{CD}_3\text{NO}_2$ , 298 K):

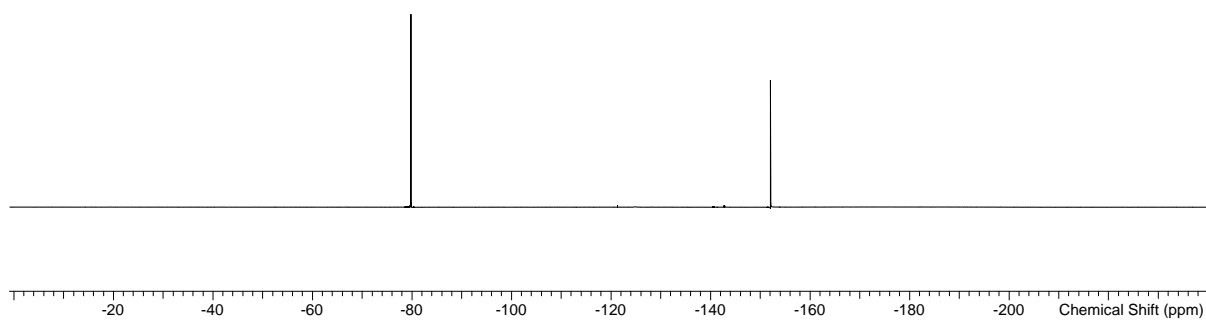

S12.3 IR spectrum (Nujol/ $\text{cm}^{-1}$ ):

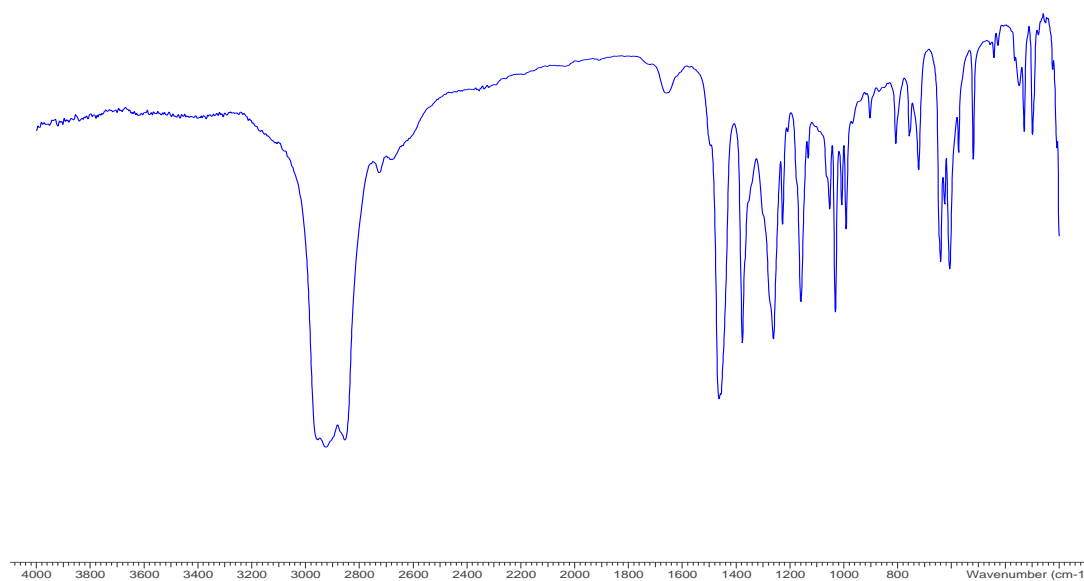

S12.4: LRMS (ESI<sup>+</sup>) (LHS: actual spectrum, RHS: simulated spectrum)

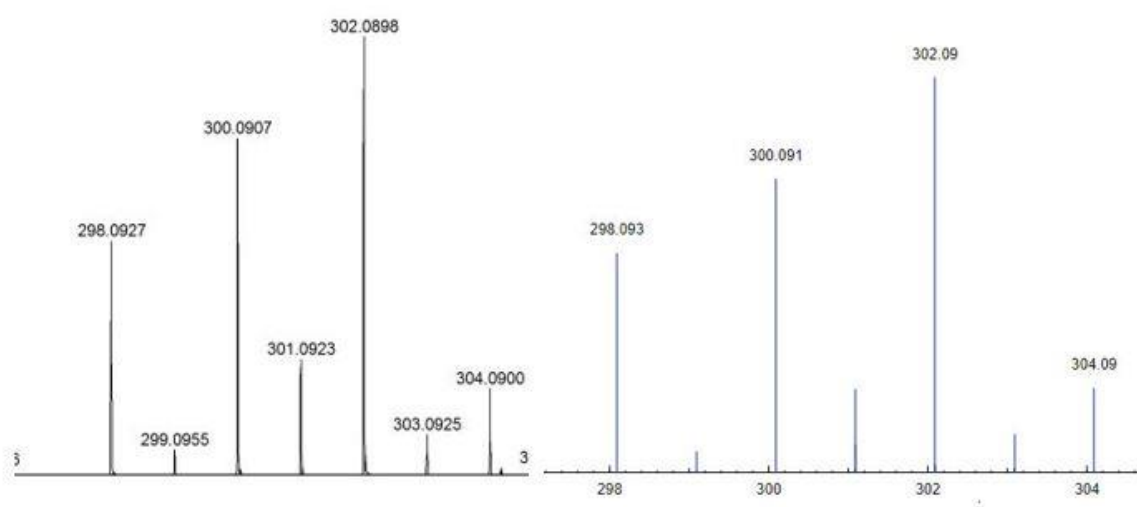

Figure S13.  $[\text{GeF}_2(\text{Me}_4\text{-cyclen})][\text{OTf}]_2$

S13.1  $^1\text{H}$  NMR spectrum ( $\text{CD}_3\text{NO}_2^*$ , 298 K) ( $\text{CH}_2\text{Cl}_2^{\%}$ ):

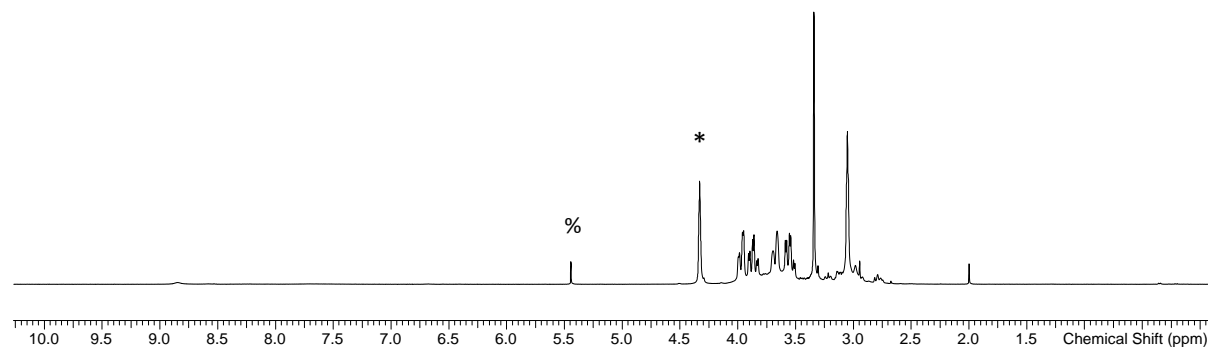

S13.2  $^{19}\text{F}\{^1\text{H}\}$  NMR spectrum ( $\text{CD}_3\text{NO}_2$ , 298 K):

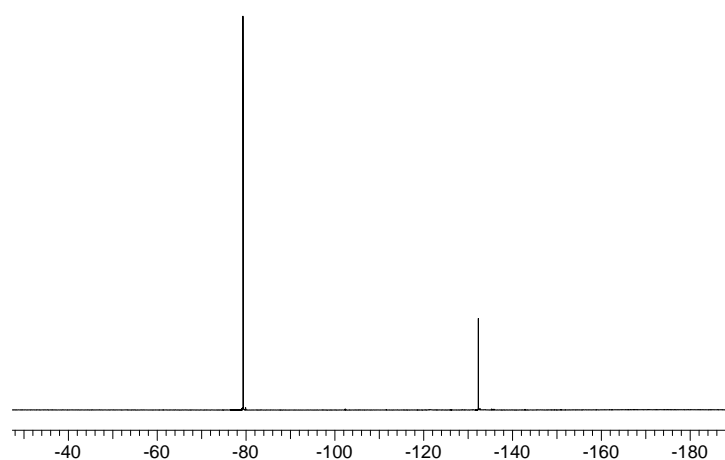

S13.3 LRMS ( $\text{ESI}^+$ ,  $\text{CH}_3\text{NO}_2$ ) (LHS: actual spectrum, RHS: simulated spectrum)

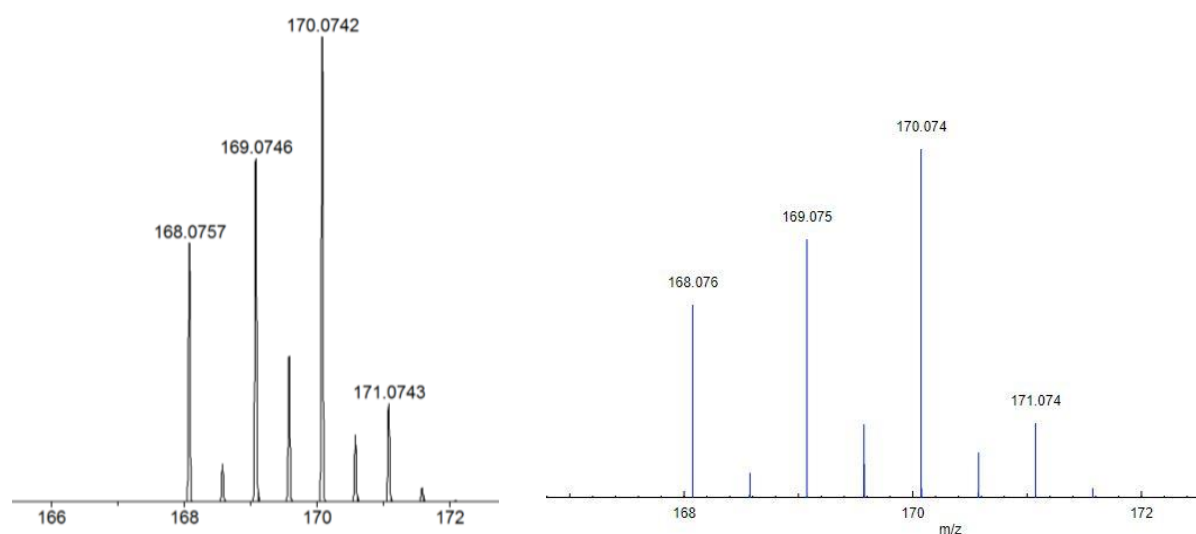

S13.4 IR spectrum (Nujol/cm<sup>-1</sup>):

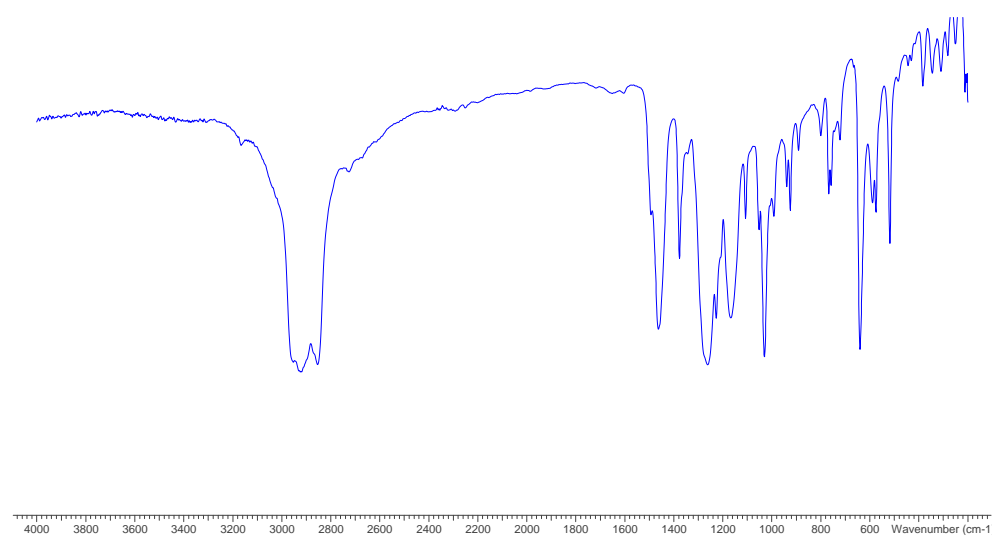

Figure S14.  $[\text{GeF}_2(\text{Me}_4\text{-cyclam})][\text{OTf}]_2$   
 S14.1  $^1\text{H}$  NMR spectrum ( $\text{CD}_3\text{NO}_2^*$ , 298 K) ( $\text{CH}_2\text{Cl}_2^\%$ ):

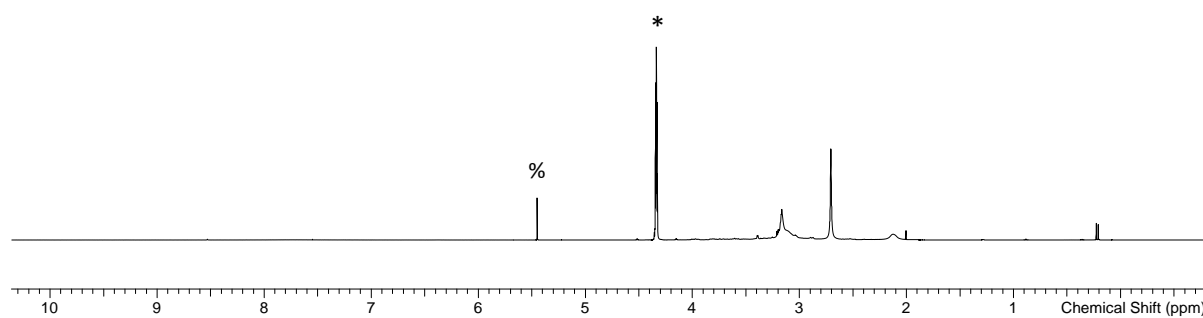

S14.2  $^{19}\text{F}\{^1\text{H}\}$  NMR spectrum ( $\text{CD}_3\text{NO}_2$ , 298 K). OTf resonance omitted for clarity:

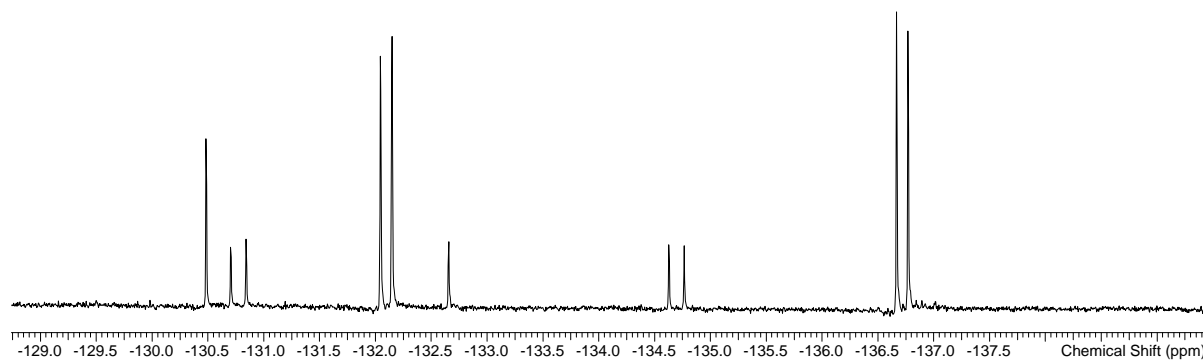

S14.3 LRMS ( $\text{ESI}^+$ ,  $\text{CH}_3\text{NO}_2$ )(LHS: actual spectrum, RHS: simulated spectrum)

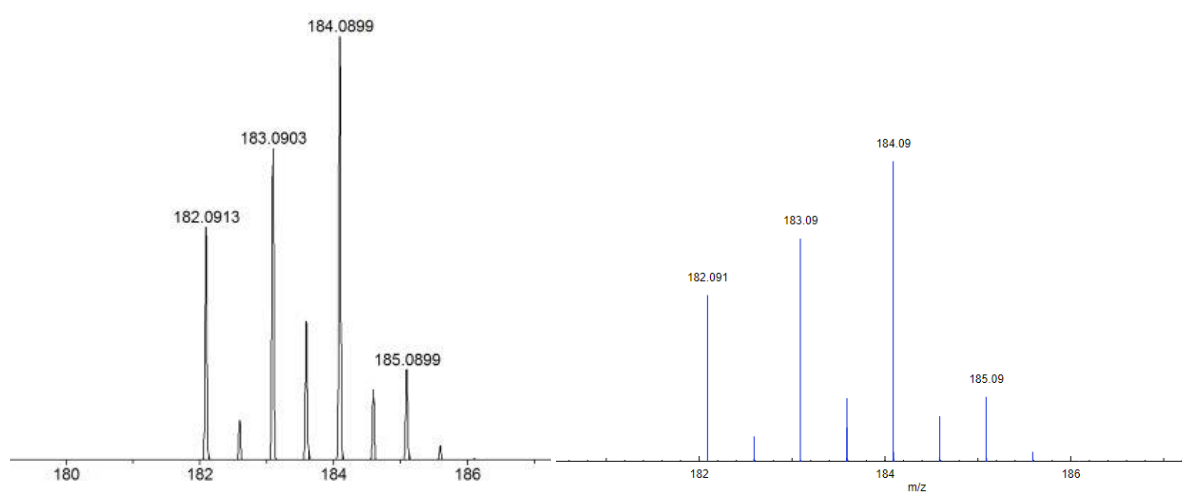

S14.4 IR spectrum (Nujol/cm<sup>-1</sup>):

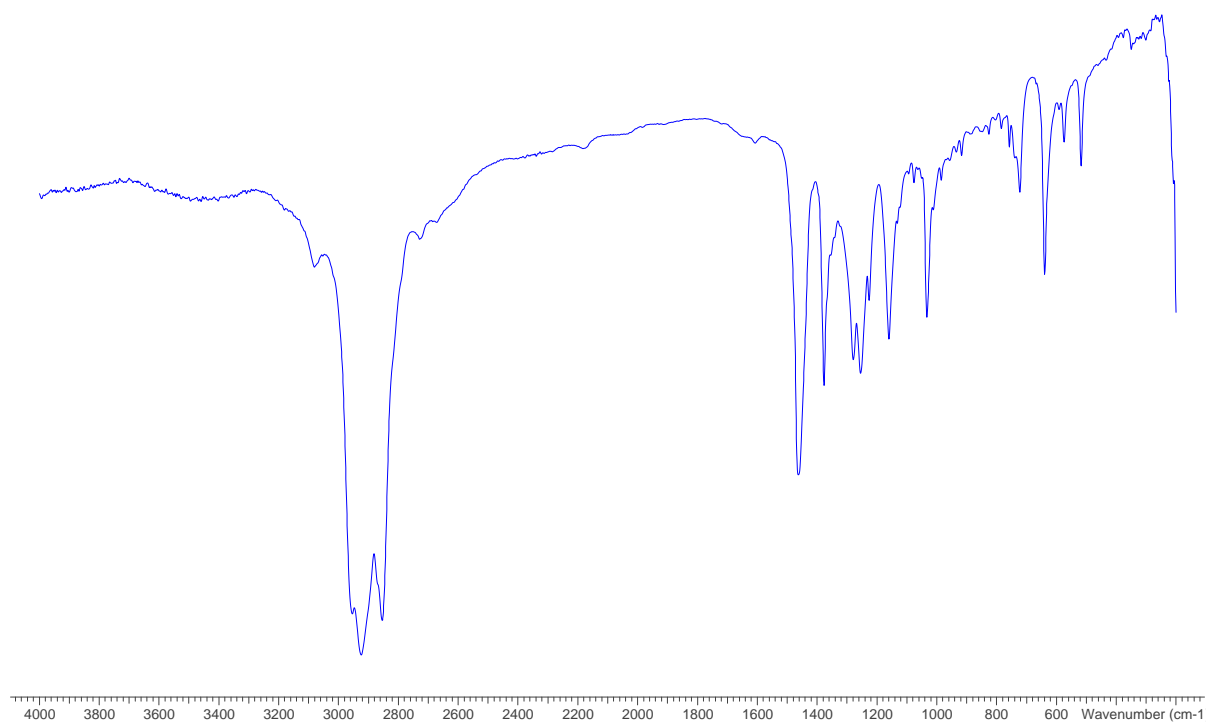



Table S1. X-ray crystallographic data <sup>a</sup>

|                                                                                                   |                                                                                                                  |                                                                                                                     |
|---------------------------------------------------------------------------------------------------|------------------------------------------------------------------------------------------------------------------|---------------------------------------------------------------------------------------------------------------------|
| Compound                                                                                          | [GeF <sub>3</sub> (OPPh <sub>3</sub> ) <sub>3</sub> ][OTf]·CH <sub>2</sub> Cl <sub>2</sub>                       | 14{[GeFe(Me <sub>4</sub> -cyclen)][OTf] <sub>2</sub> }·4CH <sub>3</sub> NO <sub>2</sub>                             |
| Formula                                                                                           | C <sub>55</sub> H <sub>45</sub> F <sub>6</sub> GeO <sub>6</sub> P <sub>3</sub> S·CH <sub>2</sub> Cl <sub>2</sub> | C <sub>200</sub> H <sub>399</sub> F <sub>112</sub> Ge <sub>14</sub> N <sub>60</sub> O <sub>92</sub> S <sub>28</sub> |
| <i>M</i>                                                                                          | 1198.39                                                                                                          | 9158.71                                                                                                             |
| Crystal system                                                                                    | Triclinic                                                                                                        | Monoclinic                                                                                                          |
| Space group (no.)                                                                                 | <i>P</i> -1 (2)                                                                                                  | <i>P</i> 2 <sub>1</sub> (4)                                                                                         |
| <i>a</i> /Å                                                                                       | 17.9880(3)                                                                                                       | 25.1422(2)                                                                                                          |
| <i>b</i> /Å                                                                                       | 18.9588(2)                                                                                                       | 30.1462(2)                                                                                                          |
| <i>c</i> /Å                                                                                       | 19.7554(3)                                                                                                       | 25.2492(2)                                                                                                          |
| $\alpha$ /°                                                                                       | 61.380(1)                                                                                                        | 90                                                                                                                  |
| $\beta$ /°                                                                                        | 70.394(1)                                                                                                        | 110.2850(10)                                                                                                        |
| $\gamma$ /°                                                                                       | 64.978(1)                                                                                                        | 90                                                                                                                  |
| <i>U</i> /Å <sup>3</sup>                                                                          | 5283.71(15)                                                                                                      | 17950.5(3)                                                                                                          |
| <i>Z</i>                                                                                          | 4                                                                                                                | 2                                                                                                                   |
| $\mu$ (Mo-K $\alpha$ ) /mm <sup>-1</sup>                                                          | 3.570                                                                                                            | 1.456                                                                                                               |
| <i>F</i> (000)                                                                                    | 2448                                                                                                             | 9318                                                                                                                |
| Total number reflns                                                                               | 100585                                                                                                           | 495295                                                                                                              |
| <i>R</i> <sub>int</sub>                                                                           | 0.040                                                                                                            | 0.069                                                                                                               |
| Unique reflns                                                                                     | 21188                                                                                                            | 107372                                                                                                              |
| No. of params, restraints                                                                         | 1351, 0                                                                                                          | 4677, 4781                                                                                                          |
| <i>R</i> <sub>1</sub> , <i>wR</i> <sub>2</sub> [ <i>I</i> > 2 $\sigma$ ( <i>I</i> )] <sup>b</sup> | 0.033, 0.083                                                                                                     | 0.086, 0.228                                                                                                        |
| <i>R</i> <sub>1</sub> , <i>wR</i> <sub>2</sub> (all data)                                         | 0.037, 0.094                                                                                                     | 0.123, 0.255                                                                                                        |

<sup>a</sup> Common items: *T* = 293 K;  $\lambda$ (Mo-K $\alpha$ ) = 0.71073 Å;  $\theta$ (max) = 27.5°; <sup>b</sup>  $R_1 = \sum ||F_o| - |F_c|| / \sum |F_o|$ ;  $wR_2 = [\sum w(F_o^2 - F_c^2)^2 / \sum wF_o^4]^{1/2}$

Figure S15. Frontier orbitals of *cis/trans*-[GeF<sub>4</sub>(OPMe<sub>3</sub>)<sub>2</sub>]

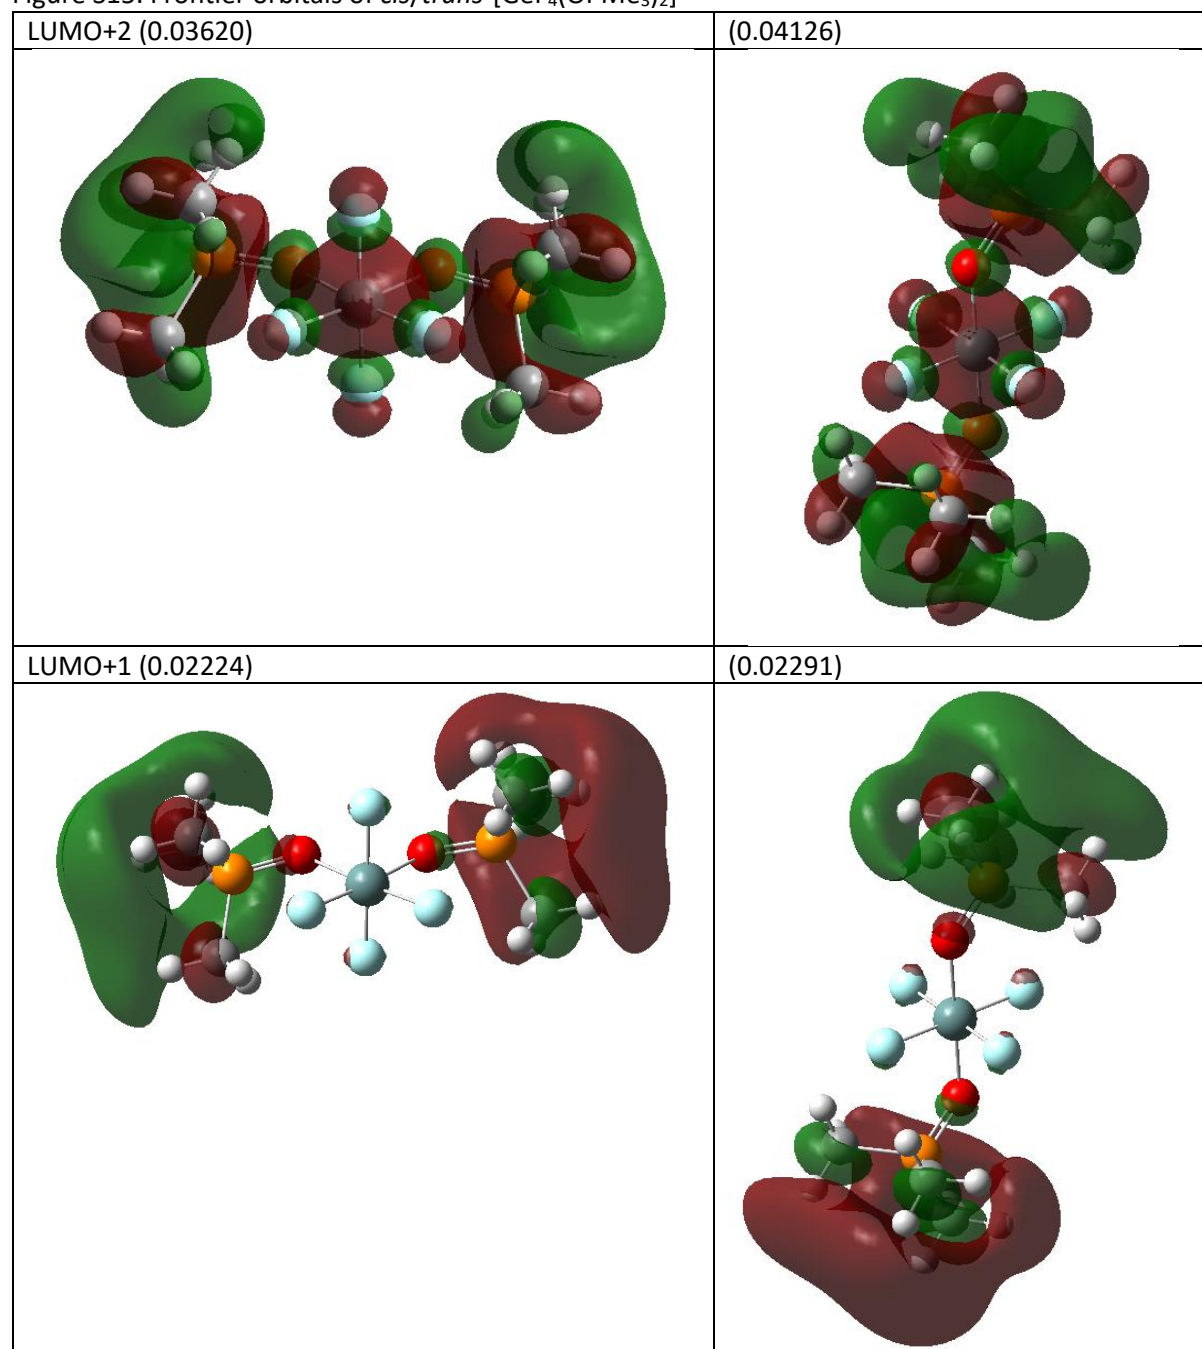

|                                                                                     |                                                                                      |
|-------------------------------------------------------------------------------------|--------------------------------------------------------------------------------------|
| LUMO (0.01187)                                                                      | (0.01521)                                                                            |
| 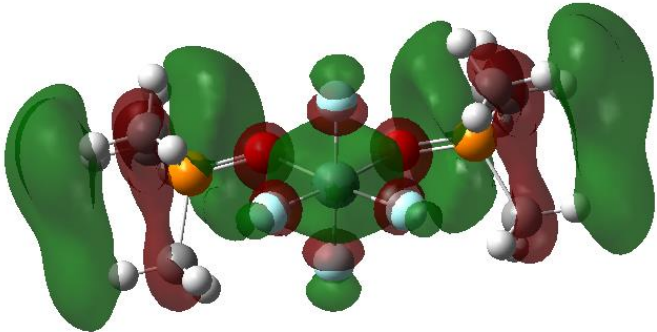   |    |
| HOMO (-0.29209)                                                                     | (-0.28990)                                                                           |
|  |  |

|                                                                                    |                                                                                     |
|------------------------------------------------------------------------------------|-------------------------------------------------------------------------------------|
| HOMO-1 (-0.29275)                                                                  | (-0.29438)                                                                          |
| 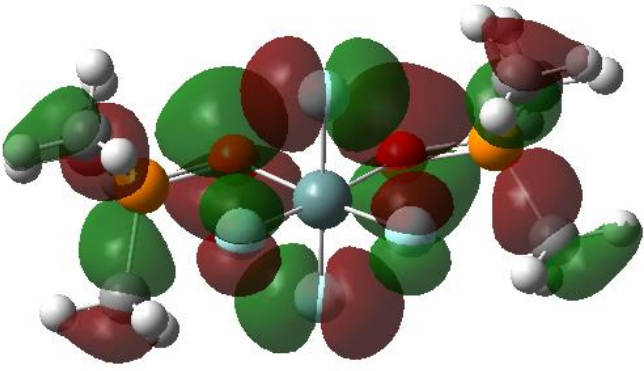  |  |
| HOMO-2 (-0.30315)                                                                  | (-0.30489)                                                                          |
|  |  |

Figure S16. Frontier orbitals of *fac/mer*-[GeF<sub>3</sub>(OPMe<sub>3</sub>)<sub>3</sub>]<sup>+</sup>

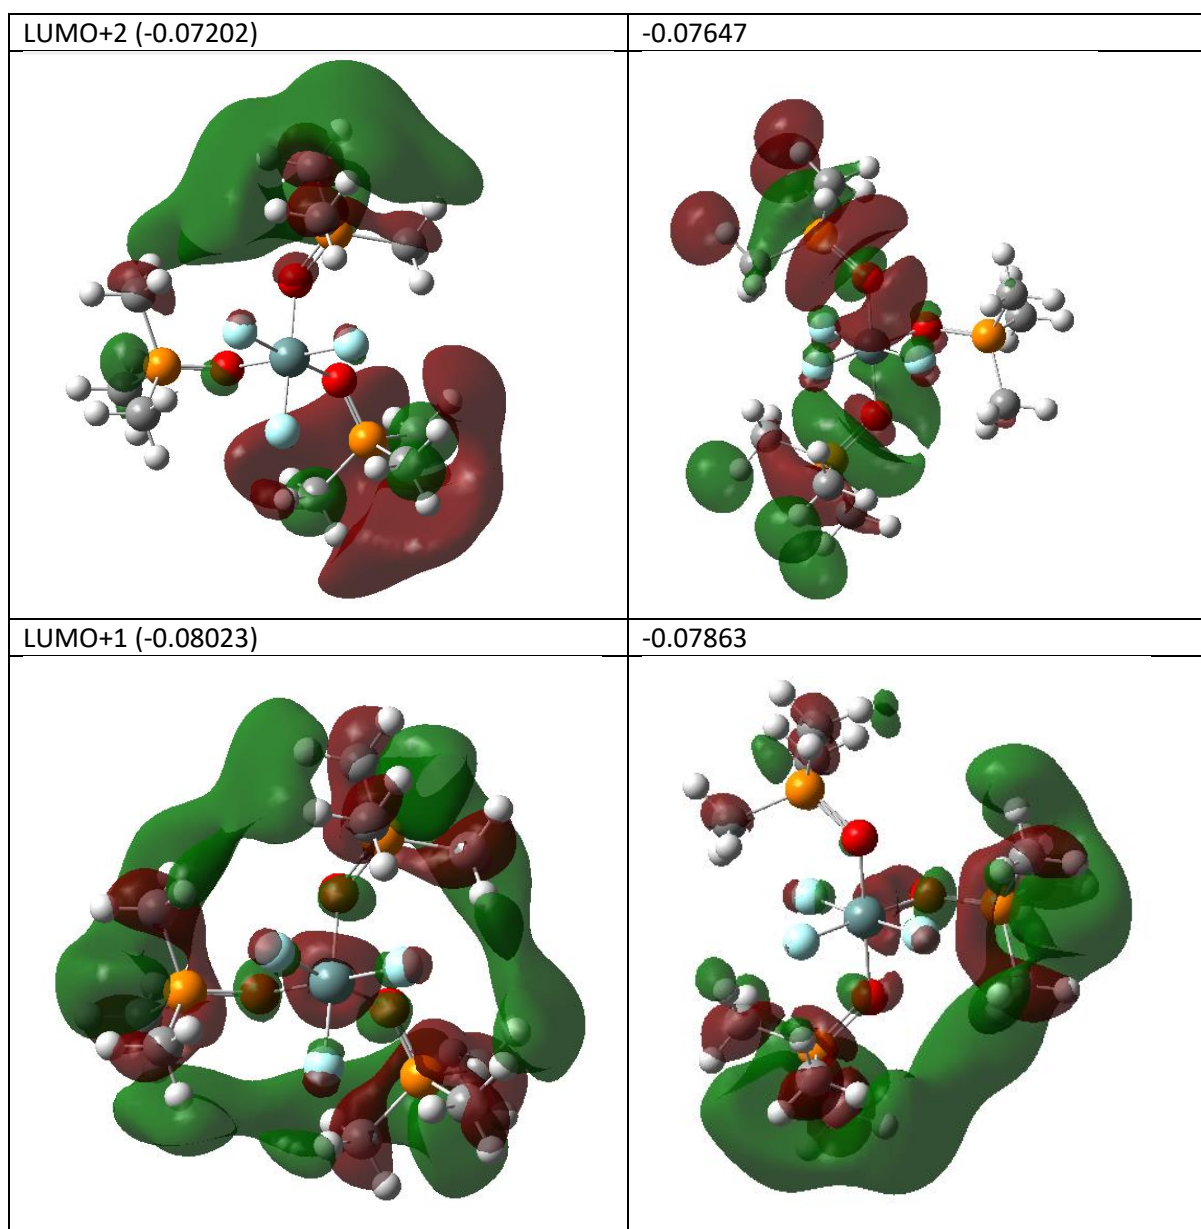



|                                                                                    |                                                                                     |
|------------------------------------------------------------------------------------|-------------------------------------------------------------------------------------|
| LUMO (-0.10779)                                                                    | (-0.11364)                                                                          |
| 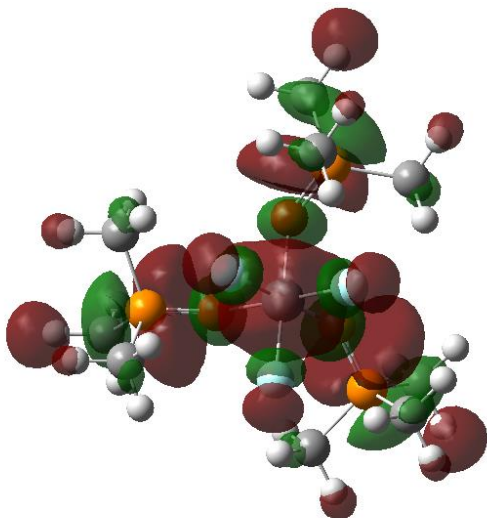  |   |
| HOMO (-0.41760)                                                                    | -0.38878                                                                            |
|  |  |

|                                                                                    |                                                                                     |
|------------------------------------------------------------------------------------|-------------------------------------------------------------------------------------|
| HOMO-1 (-0.41978)                                                                  | (-0.44048)                                                                          |
| 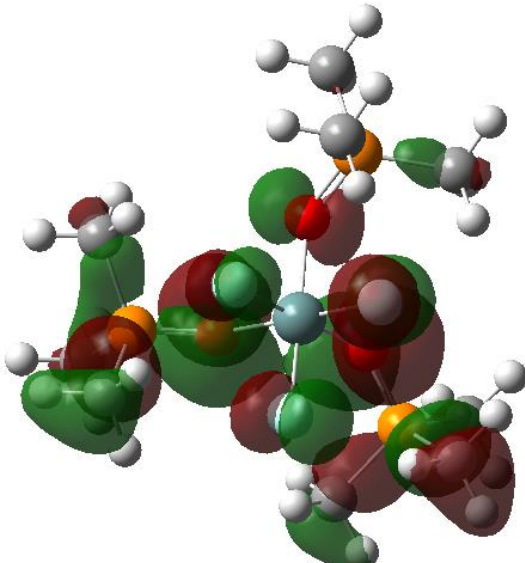  |   |
| HOMO-2 (-0.41985)                                                                  | (-0.40885)                                                                          |
|  |  |

Figure S17. Frontier orbitals of *cis/trans*-[GeF<sub>2</sub>(OPMe<sub>3</sub>)<sub>4</sub>]<sup>2+</sup>

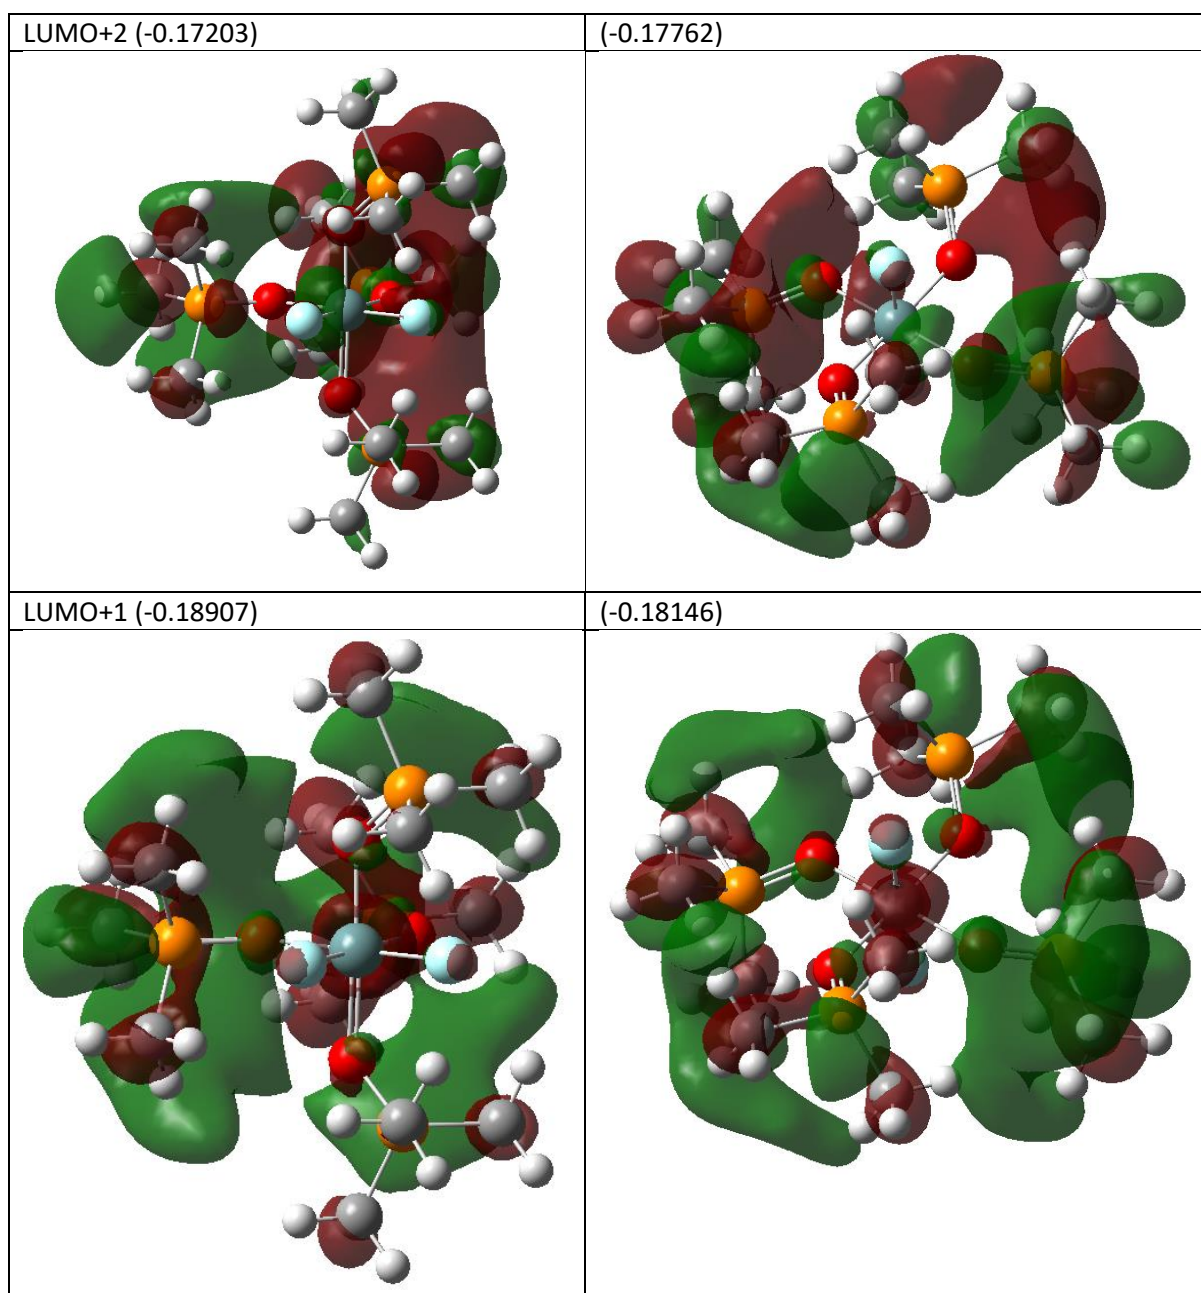



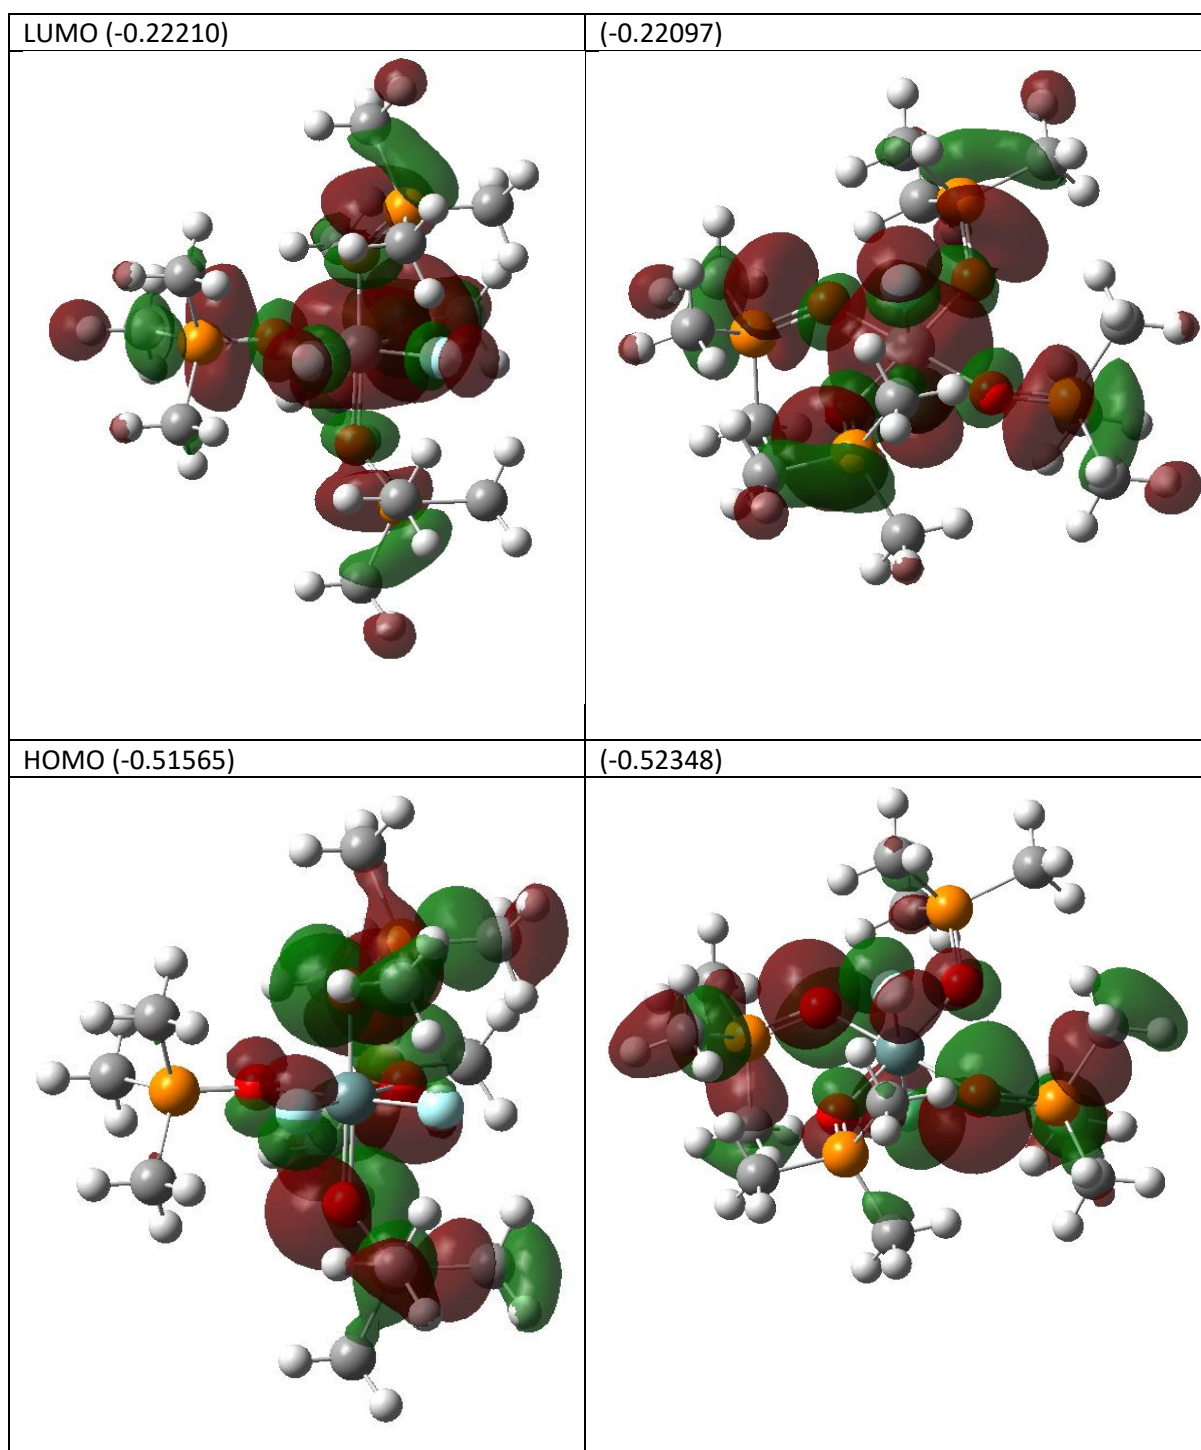

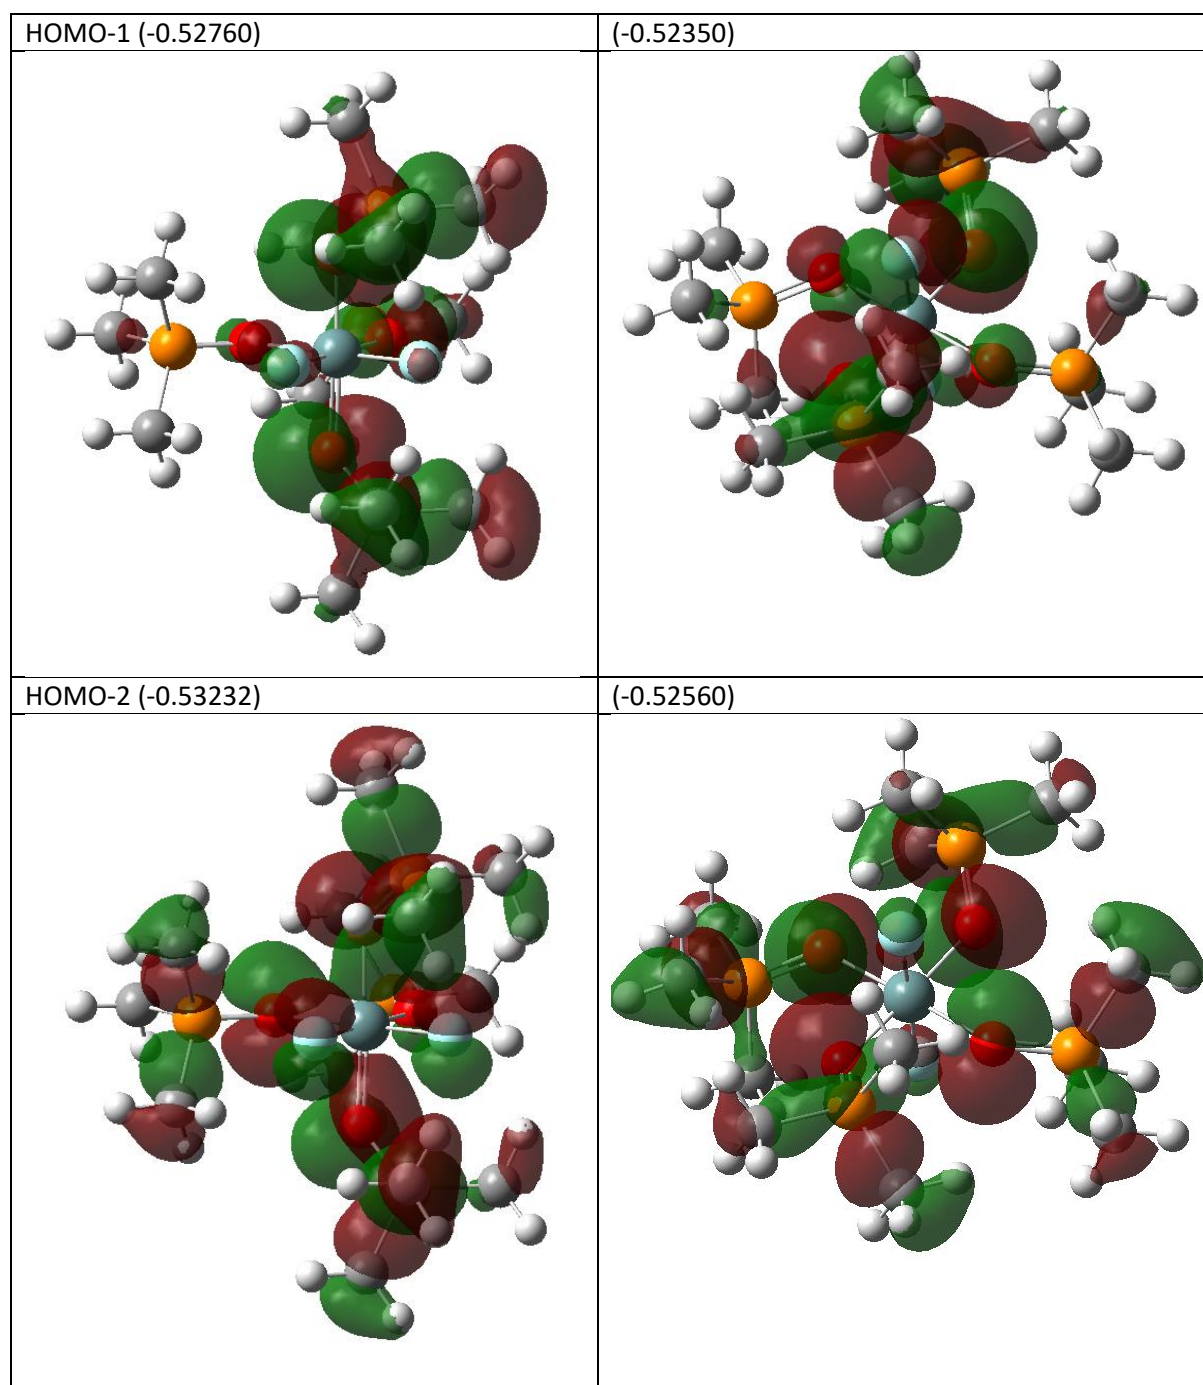

Table S2. xyz coordinates from DFT calculations

33

trans-[GeF4(OPMe3)2]

|    |            |            |            |
|----|------------|------------|------------|
| Ge | -0.0000070 | 0.0000490  | -0.0000150 |
| P  | 3.0943670  | -0.0012970 | 0.0844670  |
| F  | 0.1822370  | 1.7487870  | -0.3514200 |
| F  | -0.7901840 | 0.3920000  | 1.5893130  |
| O  | 1.7637600  | 0.0031820  | 0.8571560  |
| C  | 3.4148920  | -1.5809230 | -0.7347140 |
| H  | 3.3743110  | -2.3803020 | 0.0065170  |
| H  | 4.3904220  | -1.5813510 | -1.2254130 |
| H  | 2.6202030  | -1.7352750 | -1.4629060 |
| C  | 4.4097970  | 0.2576780  | 1.3020210  |
| H  | 4.2600300  | 1.2217730  | 1.7895370  |
| H  | 5.3936340  | 0.2396470  | 0.8292640  |
| H  | 4.3574350  | -0.5262340 | 2.0585490  |
| C  | 3.2211820  | 1.3205820  | -1.1415650 |
| H  | 2.4786460  | 1.1305220  | -1.9138050 |
| H  | 4.2258590  | 1.3585930  | -1.5682430 |
| H  | 2.9784470  | 2.2689380  | -0.6622110 |
| P  | -3.0943690 | 0.0012730  | -0.0844550 |
| F  | -0.1822090 | -1.7487030 | 0.3513890  |
| F  | 0.7901650  | -0.3920170 | -1.5893200 |
| O  | -1.7637700 | -0.0031310 | -0.8571630 |
| C  | -3.4152150 | 1.5810010  | 0.7344050  |
| H  | -3.3747820 | 2.3802310  | -0.0069950 |
| H  | -4.3907510 | 1.5813430  | 1.2250940  |
| H  | -2.6205570 | 1.7356600  | 1.4625640  |
| C  | -4.4097700 | -0.2582080 | -1.3019340 |
| H  | -4.2599160 | -1.2224400 | -1.7891520 |
| H  | -5.3936120 | -0.2401180 | -0.8291870 |
| H  | -4.3574680 | 0.5254760  | -2.0587030 |
| C  | -3.2208620 | -1.3203680 | 1.1418610  |
| H  | -2.4782550 | -1.1300510 | 1.9139720  |
| H  | -4.2254800 | -1.3584000 | 1.5686740  |
| H  | -2.9780720 | -2.2688010 | 0.6626890  |

33

cis-[GeF4(OPMe3)2]

|    |            |            |            |
|----|------------|------------|------------|
| Ge | 0.0000170  | -0.6404210 | 0.0000270  |
| F  | -0.2365350 | -0.5369730 | -1.7716210 |
| F  | 1.3436910  | -1.8407720 | -0.1645730 |
| F  | -1.3436800 | -1.8397630 | 0.1720230  |
| P  | 2.8412010  | 0.6159010  | -0.0154440 |
| F  | 0.2359660  | -0.5267860 | 1.7713490  |
| O  | 1.3255330  | 0.8206590  | -0.1681680 |
| C  | 3.5725230  | -0.2369400 | -1.4326030 |
| H  | 3.3375960  | 0.3161300  | -2.3431040 |
| H  | 4.6555070  | -0.3257600 | -1.3243990 |
| H  | 3.1143920  | -1.2231200 | -1.4909240 |
| C  | 3.5902630  | 2.2635590  | 0.0694080  |
| H  | 3.2012900  | 2.7877570  | 0.9432440  |

|                     |            |            |            |
|---------------------|------------|------------|------------|
| H                   | 4.6777590  | 2.1997170  | 0.1404300  |
| H                   | 3.3192680  | 2.8273280  | -0.8240980 |
| C                   | 3.3169220  | -0.2679460 | 1.4879670  |
| H                   | 2.9565470  | -1.2910900 | 1.4055300  |
| H                   | 4.4010020  | -0.2476190 | 1.6192450  |
| H                   | 2.8223830  | 0.1963090  | 2.3407660  |
| O                   | -1.3250310 | 0.8221010  | 0.1601480  |
| P                   | -2.8411270 | 0.6159670  | 0.0138780  |
| C                   | -3.5910840 | 2.2628830  | -0.0773320 |
| H                   | -4.6787430 | 2.1982590  | -0.1450560 |
| H                   | -3.3178830 | 2.8313190  | 0.8125380  |
| H                   | -3.2047080 | 2.7827560  | -0.9548940 |
| C                   | -3.5675420 | -0.2294250 | 1.4380090  |
| H                   | -3.1095840 | -1.2154620 | 1.4997590  |
| H                   | -3.3289760 | 0.3282230  | 2.3447630  |
| H                   | -4.6509600 | -0.3182610 | 1.3342270  |
| C                   | -3.3211530 | -0.2759900 | -1.4833720 |
| H                   | -2.8296360 | 0.1842300  | -2.3401210 |
| H                   | -2.9598470 | -1.2984610 | -1.3967180 |
| H                   | -4.4056370 | -0.2570830 | -1.6114600 |
| 46                  |            |            |            |
| fac-[GeF3(OPMe3)3]+ |            |            |            |
| Ge                  | -0.0013240 | 0.0005020  | -0.5361310 |
| P                   | 1.8111870  | 2.3548100  | 0.3785230  |
| P                   | 1.1367520  | -2.7442010 | 0.3782620  |
| F                   | 1.4162020  | -0.5407150 | -1.5122930 |
| F                   | -0.2405710 | 1.4993870  | -1.5110110 |
| O                   | 0.2220780  | -1.5125570 | 0.6291220  |
| O                   | 1.1967710  | 0.9492080  | 0.6306840  |
| F                   | -1.1790970 | -0.9557660 | -1.5121550 |
| C                   | 0.7621020  | -3.9302250 | 1.6869170  |
| H                   | -0.2866980 | -4.2228460 | 1.6245240  |
| H                   | 1.3860540  | -4.8205500 | 1.5915840  |
| H                   | 0.9413350  | -3.4693840 | 2.6590130  |
| C                   | 2.8889340  | -2.3242140 | 0.4911240  |
| H                   | 3.1294190  | -1.6408220 | -0.3209970 |
| H                   | 3.0772990  | -1.8315310 | 1.4458960  |
| H                   | 3.5057380  | -3.2217690 | 0.4180900  |
| C                   | 0.8279690  | -3.5354800 | -1.2130390 |
| H                   | 1.4402300  | -4.4336590 | -1.3147510 |
| H                   | -0.2264990 | -3.8020920 | -1.2875370 |
| H                   | 1.0650060  | -2.8279170 | -2.0054480 |
| C                   | 0.5759600  | 3.6665420  | 0.4906430  |
| H                   | -0.1372330 | 3.5343670  | -0.3207320 |
| H                   | 0.0555150  | 3.5864370  | 1.4459140  |
| H                   | 1.0480860  | 4.6478240  | 0.4159030  |
| C                   | 2.6513520  | 2.4789980  | -1.2128830 |
| H                   | 3.1276580  | 3.4560880  | -1.3147350 |
| H                   | 3.4057920  | 1.6955510  | -1.2872430 |
| H                   | 1.9196360  | 2.3338980  | -2.0055440 |
| C                   | 3.0267710  | 2.6197380  | 1.6868490  |

|   |            |            |            |
|---|------------|------------|------------|
| H | 3.8023780  | 1.8555320  | 1.6241050  |
| H | 3.4886530  | 3.6039480  | 1.5915000  |
| H | 2.5381370  | 2.5458750  | 2.6590810  |
| O | -1.4225590 | 0.5627540  | 0.6302130  |
| P | -2.9469250 | 0.3886810  | 0.3790720  |
| C | -3.4773830 | 1.0542610  | -1.2113960 |
| H | -4.5616610 | 0.9756600  | -1.3122330 |
| H | -3.1788670 | 2.1001850  | -1.2852110 |
| H | -2.9853760 | 0.4948600  | -2.0049750 |
| C | -3.7853120 | 1.3057060  | 1.6888720  |
| H | -3.5118530 | 2.3597900  | 1.6284480  |
| H | -4.8685010 | 1.2131200  | 1.5927720  |
| H | -3.4771960 | 0.9176770  | 2.6604520  |
| C | -3.4609880 | -1.3382480 | 0.4898630  |
| H | -2.9883360 | -1.8877720 | -0.3219640 |
| H | -3.1304550 | -1.7488690 | 1.4448280  |
| H | -4.5466430 | -1.4228820 | 0.4148710  |

46

mer-[GeF3(OPMe3)3]+

|    |            |            |            |
|----|------------|------------|------------|
| Ge | -0.0139130 | -0.1266480 | 0.1868510  |
| P  | 2.9120360  | -1.2946790 | -0.1362920 |
| P  | -0.0064540 | 3.0096510  | -0.1385260 |
| P  | -2.9441480 | -1.2828570 | -0.0690770 |
| F  | 0.2662510  | 0.8457640  | 1.7094790  |
| F  | -0.3527390 | -1.0639680 | -1.3648170 |
| F  | 0.3134750  | -1.7375330 | 1.0291030  |
| O  | -0.2742770 | 1.4938930  | -0.7478440 |
| O  | 1.8449260  | -0.0296490 | -0.2289200 |
| O  | -1.8589710 | -0.2261720 | 0.5981130  |
| C  | -0.2530340 | 4.1394900  | -1.5773810 |
| H  | -1.2572110 | 3.9977330  | -1.9656460 |
| H  | -0.1179020 | 5.1715270  | -1.2625610 |
| H  | 0.4687880  | 3.8865050  | -2.3482610 |
| C  | 1.7144700  | 3.2171230  | 0.5044030  |
| H  | 1.8053340  | 2.6209430  | 1.4048720  |
| H  | 2.4045890  | 2.8454830  | -0.2465490 |
| H  | 1.8980430  | 4.2694870  | 0.7089050  |
| C  | -1.2238700 | 3.4323440  | 1.1863090  |
| H  | -1.0499560 | 4.4506880  | 1.5269030  |
| H  | -2.2280790 | 3.3395310  | 0.7833240  |
| H  | -1.0838310 | 2.7239010  | 1.9955420  |
| C  | 2.2983630  | -2.7995550 | -1.0196520 |
| H  | 1.5038000  | -3.2322890 | -0.4238390 |
| H  | 1.8976310  | -2.4925120 | -1.9806550 |
| H  | 3.1195390  | -3.5009580 | -1.1484250 |
| C  | 3.3029350  | -1.7098510 | 1.6213490  |
| H  | 4.0343420  | -2.5143940 | 1.6522690  |
| H  | 3.6986790  | -0.8260980 | 2.1137020  |
| H  | 2.3754710  | -2.0117770 | 2.0961720  |
| C  | 4.4401060  | -0.6862280 | -0.9761570 |
| H  | 4.7864970  | 0.2102170  | -0.4702690 |

|   |            |            |            |
|---|------------|------------|------------|
| H | 5.2110900  | -1.4522200 | -0.9384140 |
| H | 4.2009470  | -0.4512170 | -2.0092100 |
| C | -4.4410610 | -1.1679130 | 1.0044270  |
| H | -4.7776930 | -0.1357630 | 1.0284360  |
| H | -5.2274200 | -1.8069490 | 0.6096670  |
| H | -4.1735360 | -1.4823500 | 2.0089770  |
| C | -3.3753480 | -0.7743290 | -1.7924530 |
| H | -2.4553660 | -0.7795520 | -2.3677100 |
| H | -4.0977410 | -1.4720570 | -2.2100320 |
| H | -3.7940980 | 0.2276400  | -1.7714330 |
| C | -2.3333140 | -3.0287180 | -0.0721860 |
| H | -1.9149710 | -3.2480690 | 0.9049530  |
| H | -3.1617780 | -3.6962740 | -0.2981040 |
| H | -1.5532500 | -3.1072730 | -0.8200240 |

59

cis-[GeF2(OPMe3)4]2+

|    |            |            |            |
|----|------------|------------|------------|
| Ge | 0.0000048  | -0.3040243 | -0.1631384 |
| F  | 0.0000035  | -2.0976846 | 0.0616616  |
| F  | 0.0000840  | -0.4668580 | -1.9645257 |
| O  | -1.9046937 | -0.2566489 | -0.1597744 |
| O  | -0.0000080 | -0.1093802 | 1.7205111  |
| O  | -0.0000184 | 1.5992639  | -0.3295207 |
| O  | 1.9047116  | -0.2566406 | -0.1596542 |
| P  | -2.9078268 | -1.4534183 | -0.3113311 |
| P  | -0.0001236 | 1.0855672  | 2.7179944  |
| P  | 2.9078912  | -1.4533656 | -0.3111877 |
| P  | 0.0000179  | 2.4552102  | -1.6465429 |
| C  | -2.5416891 | -2.4823415 | -1.7447014 |
| H  | -1.5830024 | -2.9754186 | -1.5973713 |
| H  | -3.3247343 | -3.2322980 | -1.8730466 |
| H  | -2.4862809 | -1.8627832 | -2.6397887 |
| C  | -2.9212878 | -2.4861447 | 1.1660533  |
| H  | -1.9232636 | -2.8939156 | 1.3196914  |
| H  | -3.2058702 | -1.8873895 | 2.0323742  |
| H  | -3.6363169 | -3.3032281 | 1.0522464  |
| C  | -4.5414222 | -0.7236279 | -0.5262003 |
| H  | -4.7771103 | -0.0801807 | 0.3223290  |
| H  | -4.5647452 | -0.1293390 | -1.4405395 |
| H  | -5.2997558 | -1.5056908 | -0.5964371 |
| C  | 1.4685606  | 2.1153722  | 2.5280628  |
| H  | 2.3607932  | 1.5105061  | 2.6932049  |
| H  | 1.4952990  | 2.5147011  | 1.5163254  |
| H  | 1.4572973  | 2.9341605  | 3.2498595  |
| C  | -0.0003237 | 0.3856690  | 4.3770350  |
| H  | 0.0000468  | 1.1791294  | 5.1268321  |
| H  | -0.8868649 | -0.2340202 | 4.5172267  |
| H  | 0.8857545  | -0.2347158 | 4.5170848  |
| C  | -1.4686958 | 2.1154708  | 2.5277257  |
| H  | -1.4948861 | 2.5152670  | 1.5161598  |
| H  | -2.3610198 | 1.5105328  | 2.6920945  |
| H  | -1.4578018 | 2.9339176  | 3.2499154  |

|   |            |            |            |
|---|------------|------------|------------|
| C | 1.4706384  | 2.1597687  | -2.6442399 |
| H | 1.4493459  | 1.1340752  | -3.0069689 |
| H | 1.4944059  | 2.8491110  | -3.4904749 |
| H | 2.3606337  | 2.3118122  | -2.0325707 |
| C | -1.4703426 | 2.1595454  | -2.6445539 |
| H | -2.3605086 | 2.3115366  | -2.0331208 |
| H | -1.4939635 | 2.8488564  | -3.4908194 |
| H | -1.4488488 | 1.1338377  | -3.0072266 |
| C | -0.0001502 | 4.1794760  | -1.1189043 |
| H | 0.0000024  | 4.8400145  | -1.9879897 |
| H | -0.8892591 | 4.3900360  | -0.5230075 |
| H | 0.8887269  | 4.3900646  | -0.5226704 |
| C | 4.5414551  | -0.7235037 | -0.5260719 |
| H | 4.7772060  | -0.0801776 | 0.3225326  |
| H | 5.2998088  | -1.5055254 | -0.5965211 |
| H | 4.5646582  | -0.1290595 | -1.4403150 |
| C | 2.5418541  | -2.4823588 | -1.7445355 |
| H | 1.5832061  | -2.9755126 | -1.5972172 |
| H | 2.4864050  | -1.8628166 | -2.6396316 |
| H | 3.3249702  | -3.2322452 | -1.8728506 |
| C | 2.9213605  | -2.4860156 | 1.1662443  |
| H | 1.9233975  | -2.8939802 | 1.3197774  |
| H | 3.6365673  | -3.3029662 | 1.0525857  |
| H | 3.2057107  | -1.8871511 | 2.0325651  |

59

trans-[GeF2(OPMe3)4]2+

|    |            |            |            |
|----|------------|------------|------------|
| Ge | -0.0002930 | -0.0000369 | -0.0006974 |
| P  | 0.9381636  | 2.9842555  | 0.5908214  |
| P  | 2.9851349  | -0.9368425 | -0.5899848 |
| P  | -0.9366585 | -2.9846077 | 0.5896184  |
| P  | -2.9854550 | 0.9372770  | -0.5898887 |
| F  | 0.0012415  | 0.0030830  | -1.7861337 |
| F  | -0.0032866 | -0.0019513 | 1.7844456  |
| O  | 1.1498176  | 1.5379925  | 0.0347033  |
| O  | 1.5393540  | -1.1479031 | -0.0320228 |
| O  | -1.5397934 | 1.1487745  | -0.0315292 |
| O  | -1.1477617 | -1.5403693 | 0.0271465  |
| C  | -2.5694317 | -3.6847723 | 0.9000699  |
| H  | -3.1790054 | -3.6315374 | -0.0030846 |
| H  | -2.4783868 | -4.7317482 | 1.1958964  |
| H  | -3.0654546 | -3.1417018 | 1.7056652  |
| C  | -0.1026695 | -4.0197451 | -0.6281929 |
| H  | 0.8799202  | -3.5987303 | -0.8315066 |
| H  | 0.0081341  | -5.0398534 | -0.2557784 |
| H  | -0.6791412 | -4.0397178 | -1.5541235 |
| C  | -0.0062778 | -3.0148987 | 2.1316594  |
| H  | -0.4743796 | -2.3466538 | 2.8535856  |
| H  | 0.0124994  | -4.0322212 | 2.5278945  |
| H  | 1.0085795  | -2.6665675 | 1.9526234  |
| C  | 3.6871423  | -2.5696108 | -0.8961437 |
| H  | 3.1427248  | -3.0693589 | -1.6985119 |

|   |            |            |            |
|---|------------|------------|------------|
| H | 4.7332423  | -2.4780122 | -1.1948834 |
| H | 3.6371849  | -3.1760632 | 0.0092982  |
| C | 4.0166790  | -0.1004716 | 0.6291055  |
| H | 5.0376755  | 0.0102589  | 0.2591567  |
| H | 3.5942696  | 0.8820629  | 0.8295829  |
| H | 4.0343610  | -0.6754351 | 1.5560432  |
| C | 3.0180890  | -0.0078644 | -2.1328098 |
| H | 2.6631080  | 1.0052070  | -1.9561195 |
| H | 4.0371027  | 0.0166698  | -2.5243698 |
| H | 2.3561174  | -0.4802924 | -2.8576811 |
| C | -3.0179839 | 0.0121340  | -2.1350465 |
| H | -2.6546253 | -0.9986243 | -1.9626856 |
| H | -4.0383943 | -0.0187086 | -2.5224873 |
| H | -2.3627114 | 0.4915343  | -2.8614846 |
| C | -4.0154761 | 0.0972008  | 0.6279759  |
| H | -4.0283556 | 0.6674693  | 1.5578953  |
| H | -5.0380364 | -0.0089367 | 0.2610360  |
| H | -3.5951399 | -0.8874443 | 0.8220092  |
| C | -3.6906366 | 2.5692550  | -0.8927448 |
| H | -4.7366117 | 2.4751867  | -1.1912824 |
| H | -3.6419675 | 3.1745610  | 0.0135074  |
| H | -3.1483065 | 3.0715624  | -1.6949275 |
| C | 0.0221079  | 3.0146523  | 2.1413629  |
| H | -0.0126425 | 4.0352836  | 2.5278224  |
| H | -0.9876421 | 2.6453643  | 1.9749416  |
| H | 0.5089043  | 2.3630508  | 2.8662183  |
| C | 0.0872948  | 4.0121723  | -0.6212999 |
| H | -0.8970511 | 3.5886754  | -0.8092995 |
| H | -0.0196732 | 5.0338527  | -0.2521260 |
| H | 0.6517073  | 4.0282143  | -1.5547180 |
| C | 2.5712304  | 3.6923064  | 0.8805968  |
| H | 3.0825418  | 3.1479136  | 1.6756416  |
| H | 3.1675838  | 3.6472728  | -0.0317862 |
| H | 2.4785379  | 4.7371252  | 1.1834736  |
